# Supplementary material for: Cooperative ETS transcription factors are required for lymphatic endothelial cell integrity and resilience
Source: JCI journal article supplement (doi:10.1172/jci196119), 2025-12-23
Supplement: sd2 [file 2]

## Supplemental Data

Supplemental Figures and Legends (1-15)

Supplemental Table 1

**Cooperative ETS transcription factors are required for lymphatic endothelial cell integrity and resilience**

Myung Jin Yang, Seok Kang, Seon Pyo Hong, Hokyung Jin, Jin-Hui Yoon, Cheol Hwa Jin, Chae Min Yuk, Lydia Getachew Gebeyehu, Junho Jung, Sung-hwan Yoon, Hyuek Jong Lee and Gou Young Koh



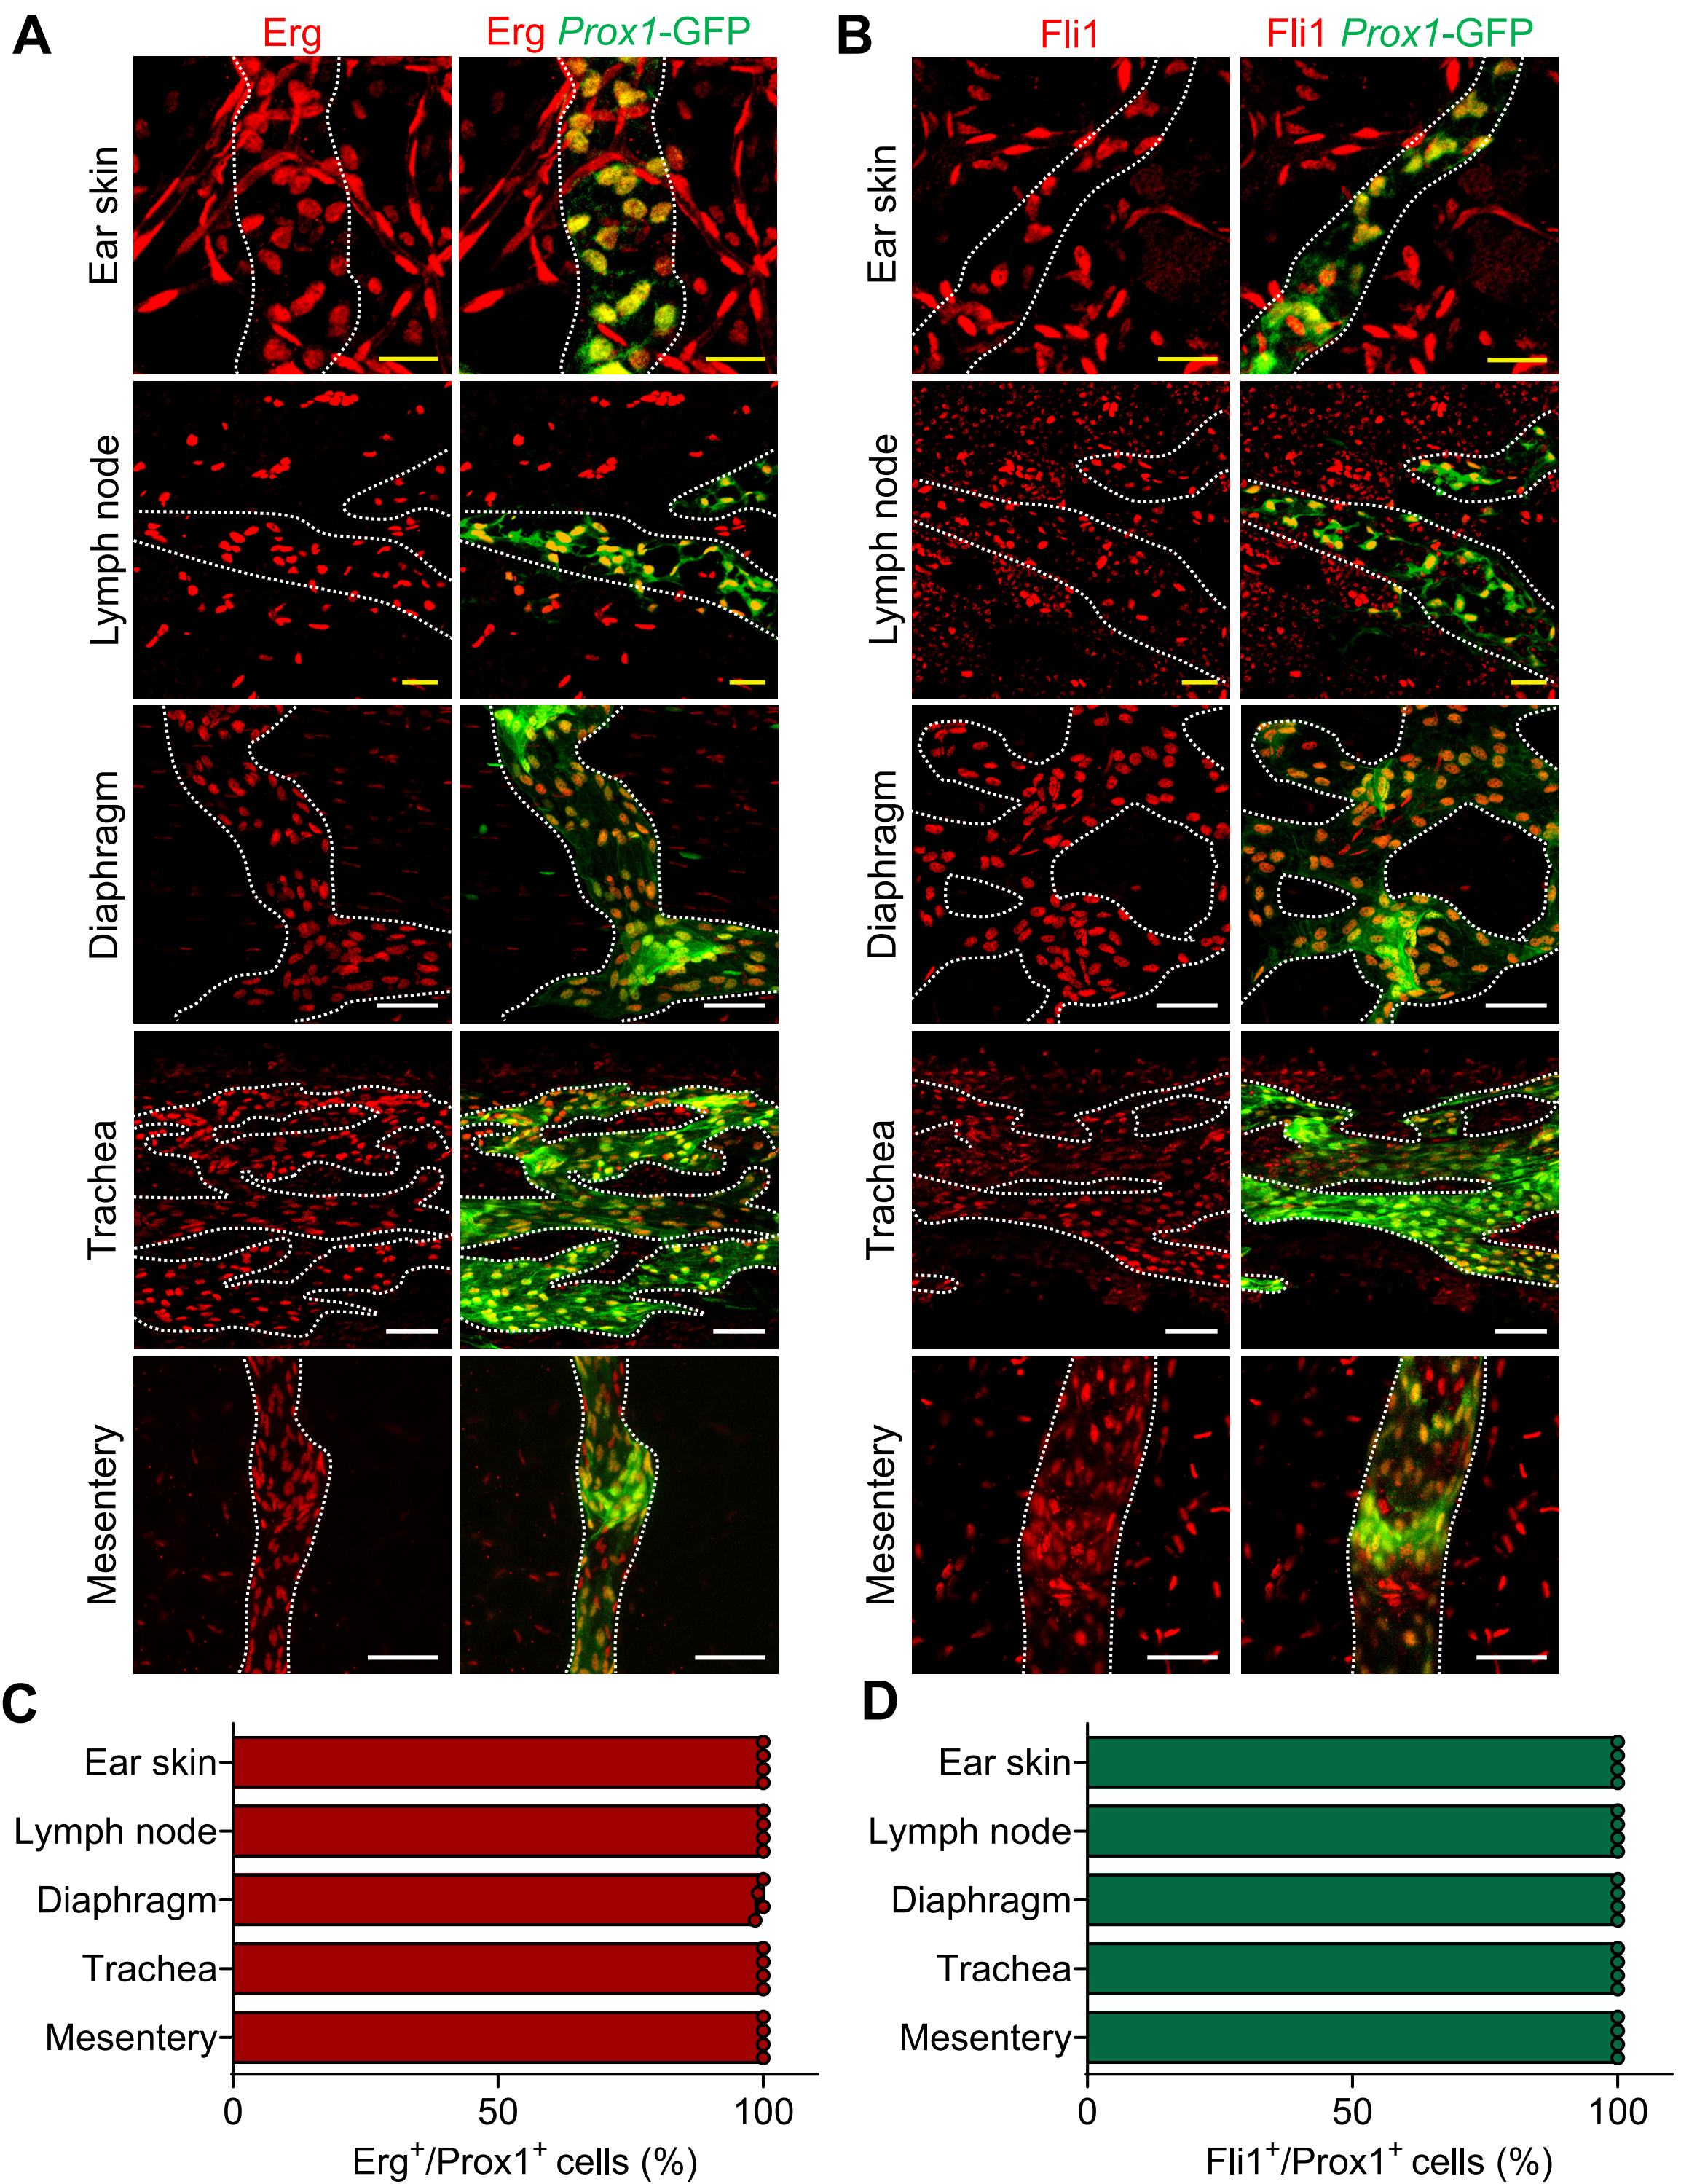

**Supplemental Figure 1. Erg and Fli1 are constitutively present in the nuclei of lymphatic endothelial cells in various organ lymphatics of adult mice**

**A-D**, Immunofluorescence images and comparisons for Erg and Fli1 in the nuclei of blood and lymphatic (marked with white dashed lines based on *Prox1*-GFP<sup>+</sup>) endothelial cells in the ear skin, lymph node, diaphragm, trachea, and mesentery of 8-week-old mice. Yellow scale bars, 20 μm. White scale bars, 50 μm. Each dot indicates a value from one mouse and n = 4 mice/group from two independent experiments. Horizontal bars indicate mean ± SD.



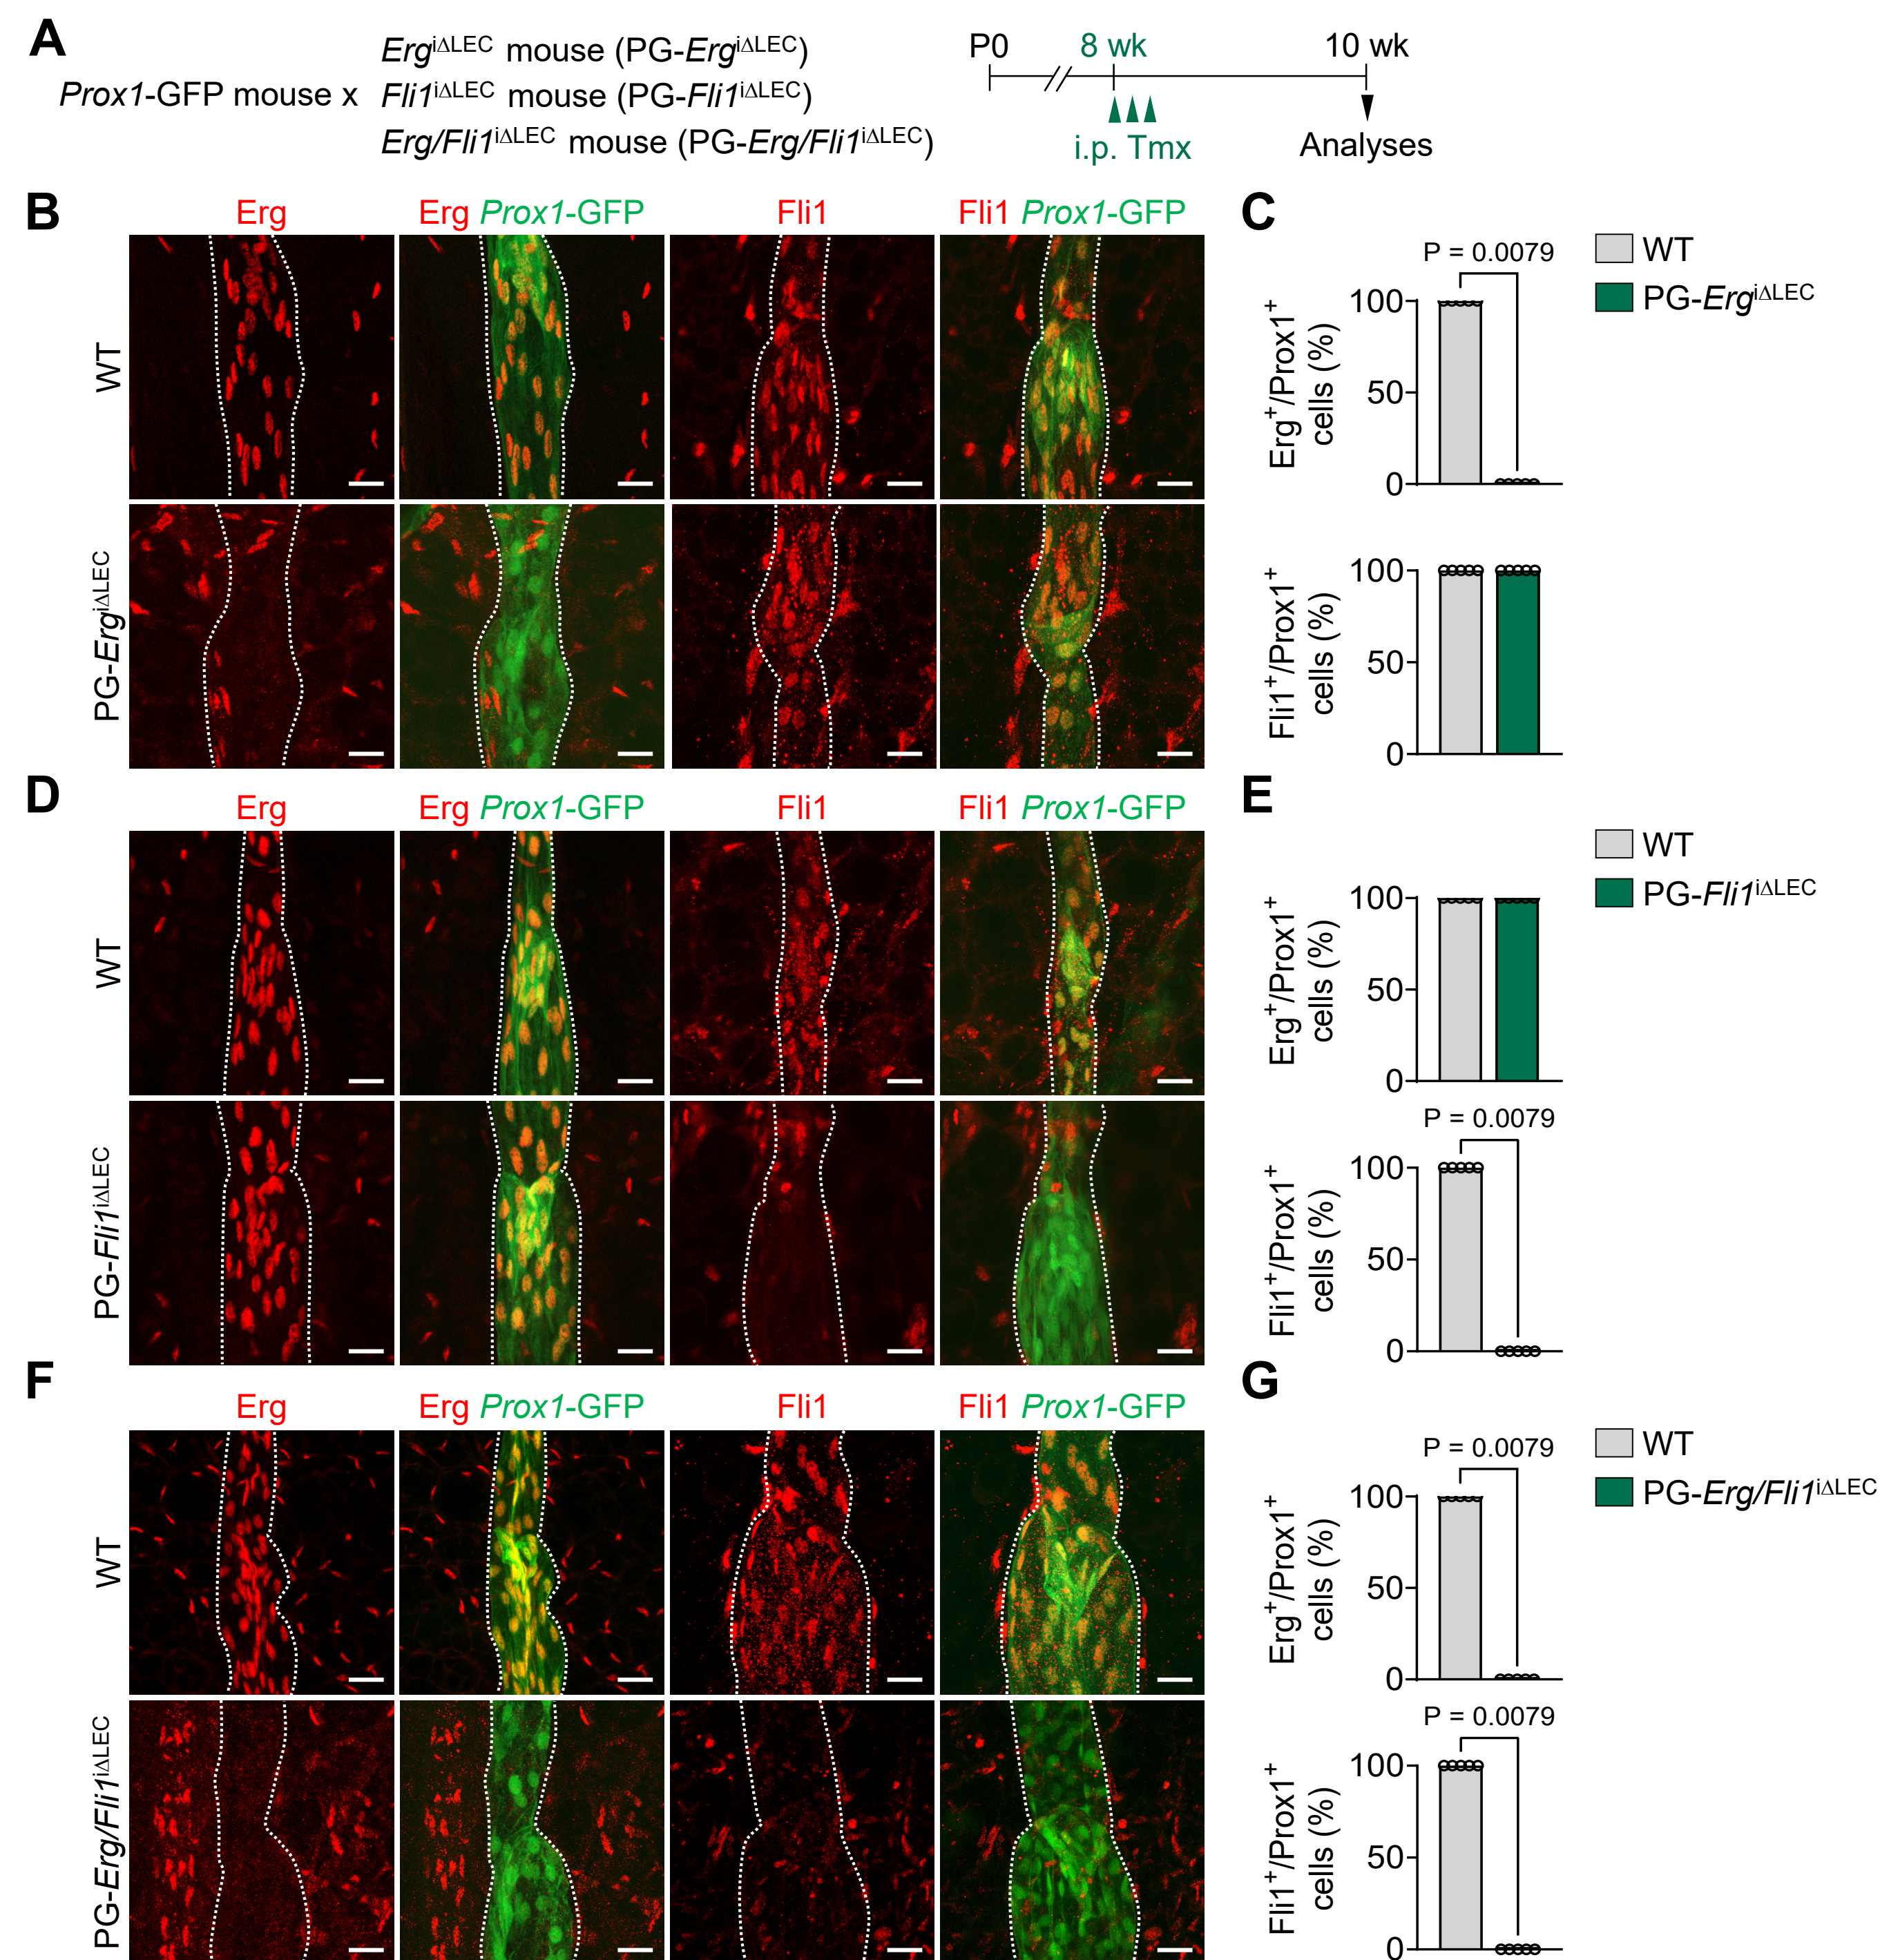

## Supplemental Figure 2. Deletion efficiency of *Erg* and *Fli1* in each lymphatic-specific conditional knock-out mice

**A**, Diagram showing schedule of intraperitoneal Tmx administrations for three consecutive days and analyses at 2 weeks after the first Tmx injection in each indicated mouse line.

**B-G**, Representative images and percentages of *Erg*<sup>+</sup> or *Fli1*<sup>+</sup> LEC in mesenteric lymphatics (white dashed lines) of the indicated mouse line. Scale bars, 20 μm. Each dot indicates a value from one mouse and n = 5 mice/group from two independent experiments. *P* values versus WT by two-tailed Mann-Whitney *U* test.



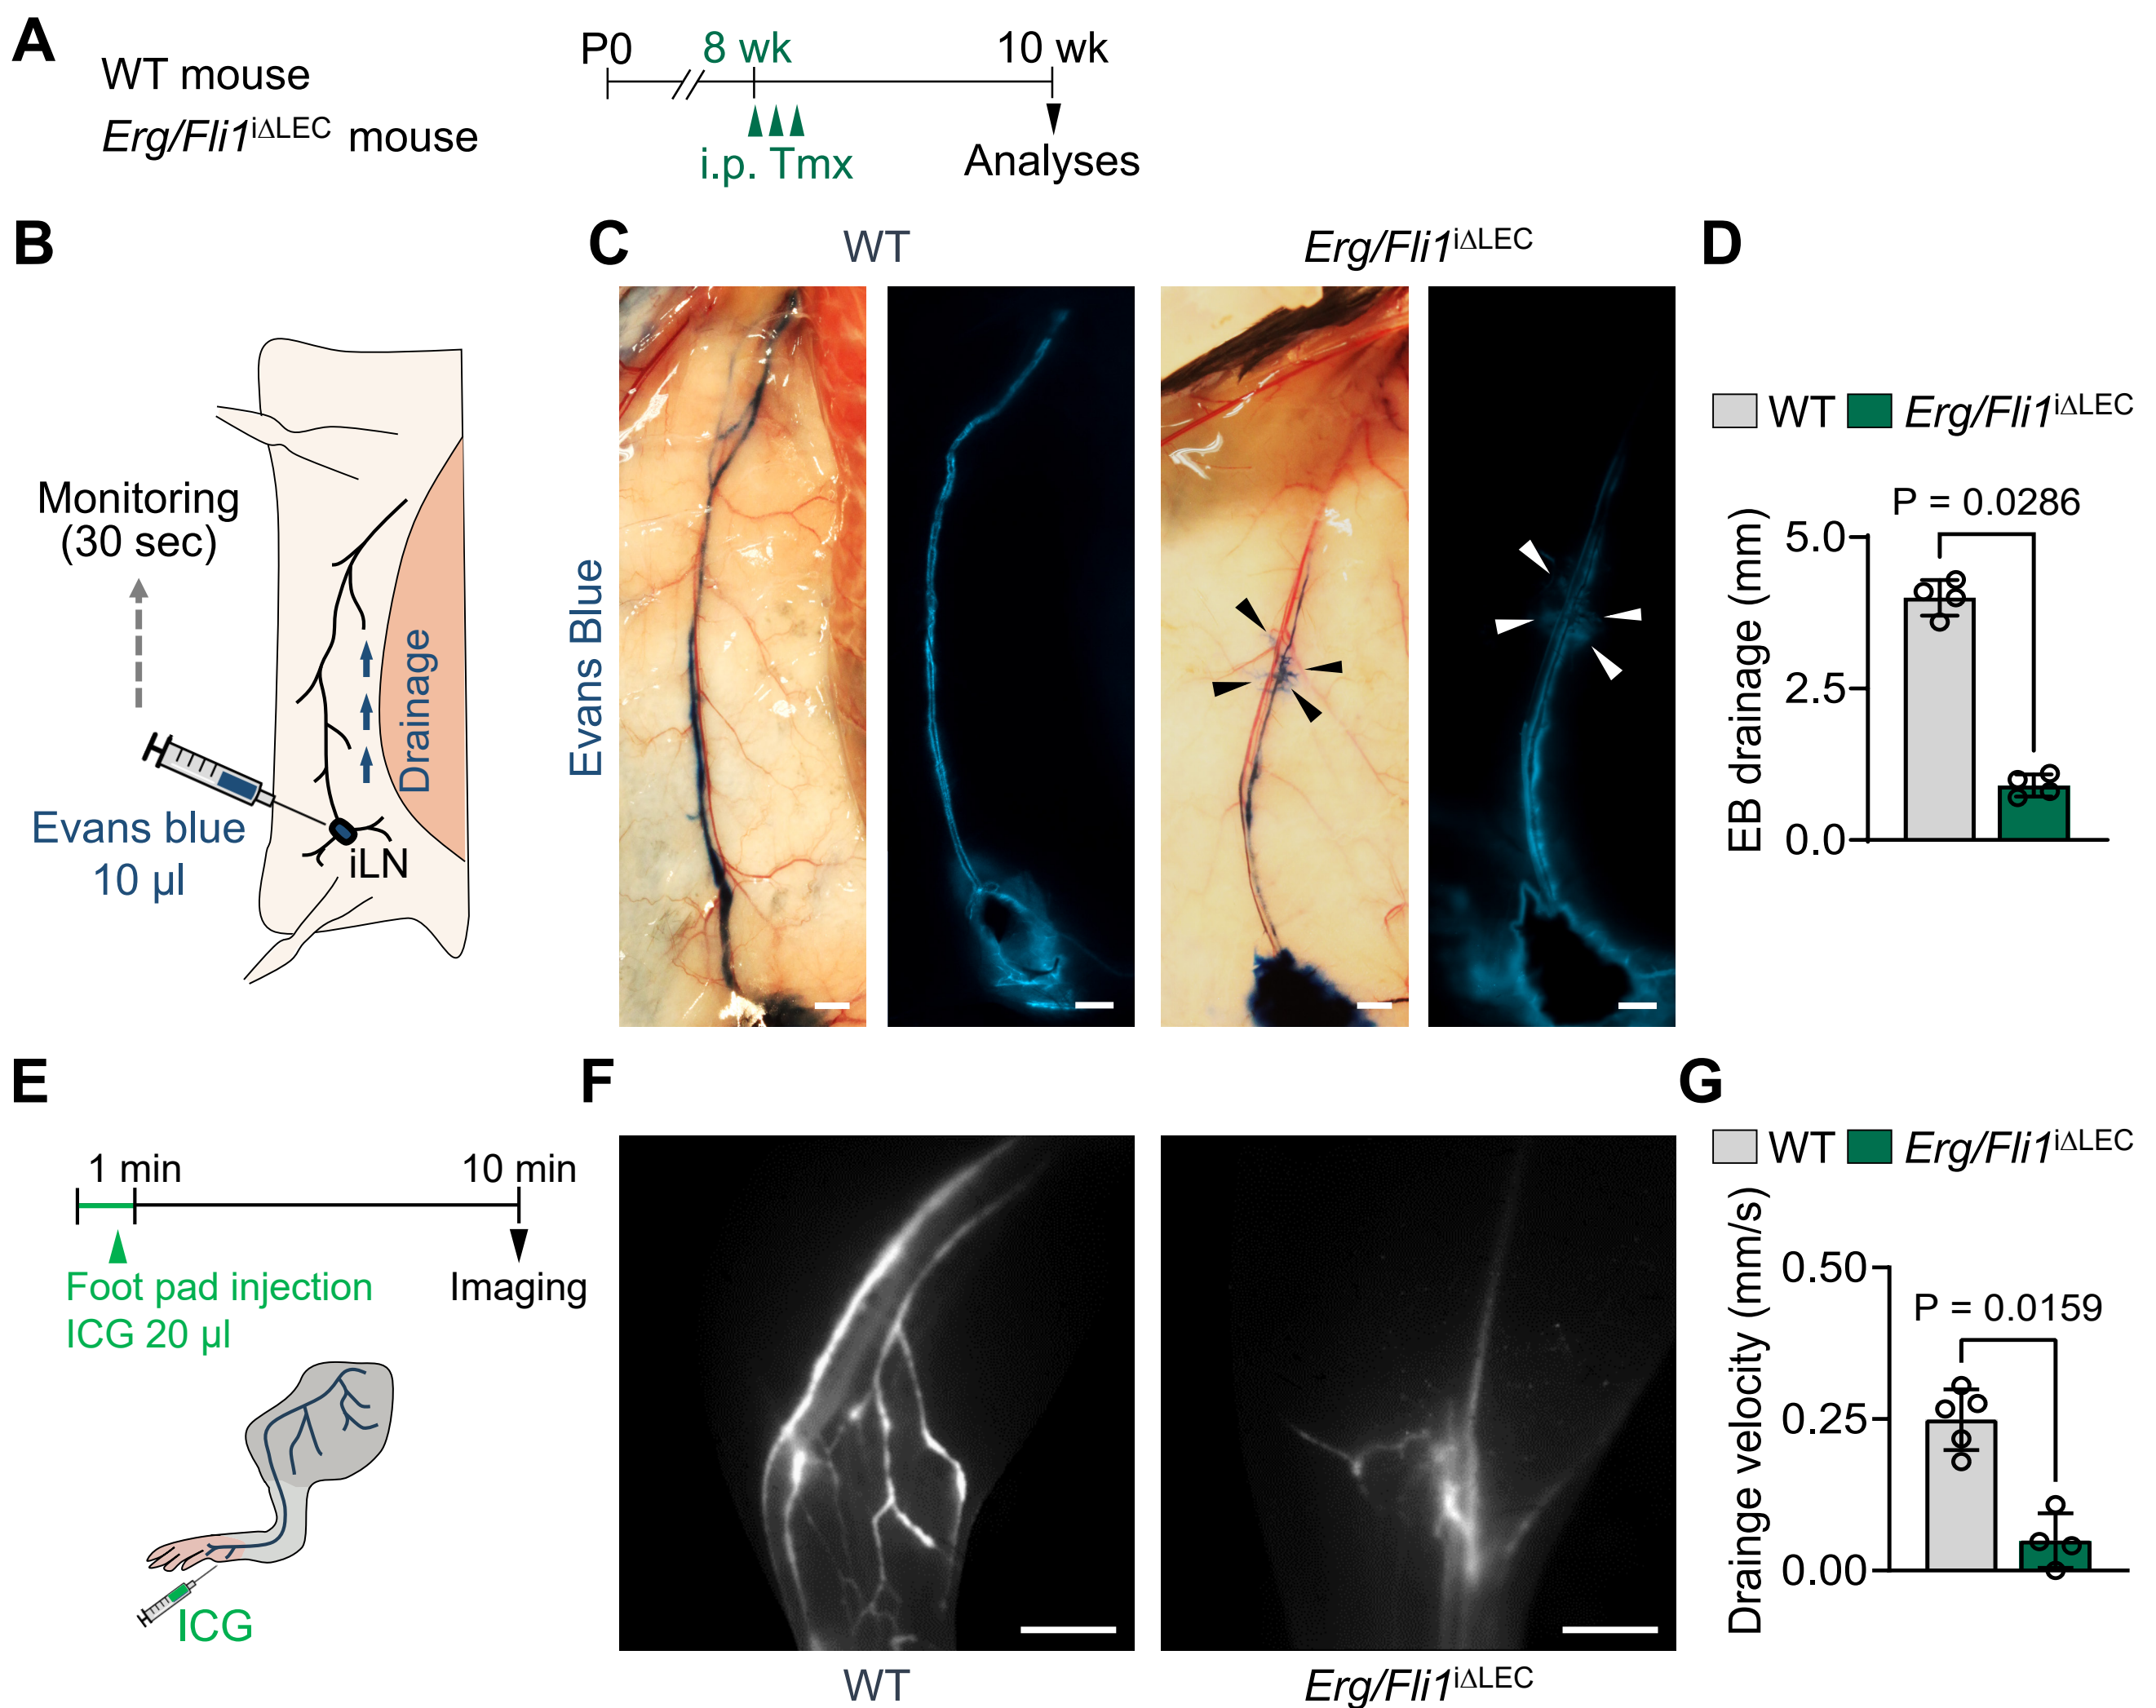

### Supplemental Figure 3. *Erg* and *Fli1* double knockout impairs lymphatic drainage function

**A-F**, **(A)** Diagram showing i.p. administrations of Tmx for three consecutive days to WT and *Erg/Fli1*<sup>ΔLEC</sup> mice for lymphatic drainage assays. **(B)** Diagram depicting lymphatic drainage assay. Ten μl of Evans blue was injected to inguinal lymph node and its drainage through the skin lymphatics was assessed at 30 seconds later. **(C,D)** Representative images of skin lymphatic drainage of Evans Blue in WT and *Erg/Fli1*<sup>ΔLEC</sup> mice. Scale bars, 2 mm. Comparison of distances of Evans blue drainage from the inguinal lymph node. Each dot indicates a value from one mouse and n = 4 mice/group from two independent experiments. Bars indicate mean ± SD and *P* values versus WT by two-tailed Mann-Whitney *U* test. **(E)** Diagram depicting thoracic duct lymphangiography. 20 μl of indocyanine green (ICG) was injected for 1 min in right hind footpads, and lymphatics in the thigh were imaged after 10 min. **(F,G)** Representative images of lymphangiography in WT and *Erg/Fli1*<sup>ΔLEC</sup> mice. Scale bars, 2 mm. Comparison of lymphatic drainage velocities. Each dot indicates a value from one mouse and n = 4-5 mice/group from two independent experiments. Bars indicate mean ± SD and *P* values versus WT by two-tailed Mann-Whitney *U* test.



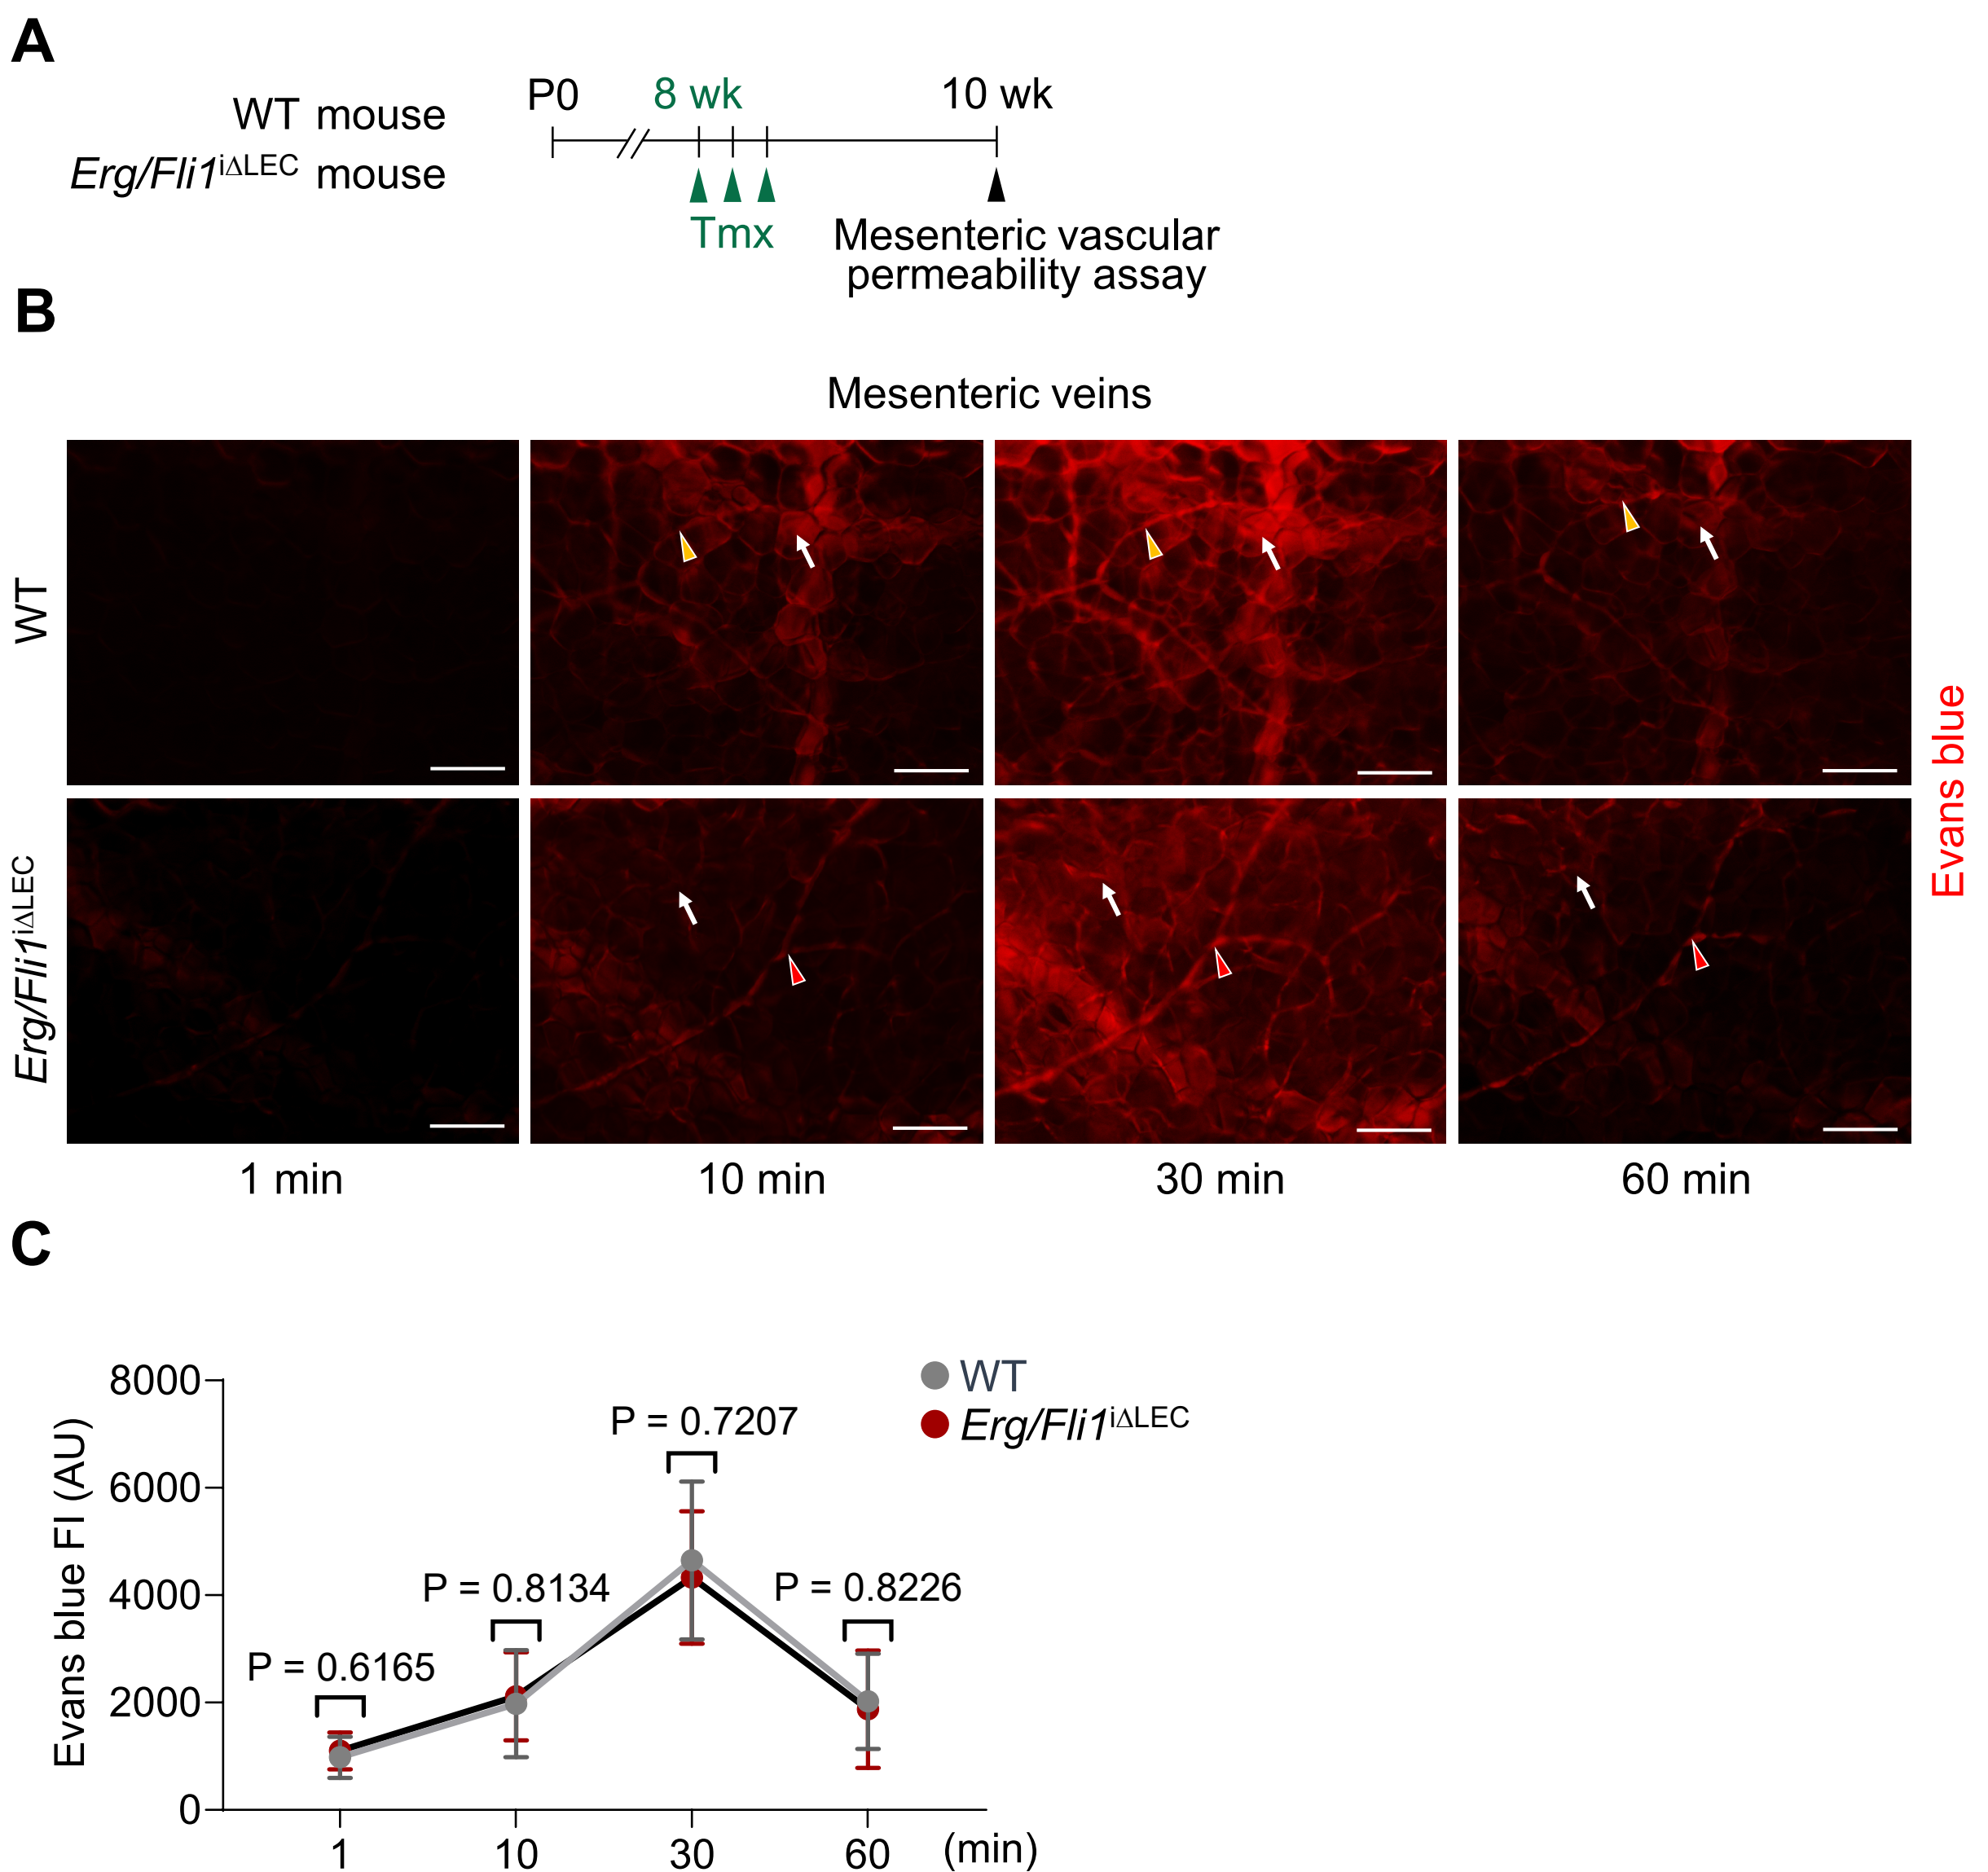

### Supplemental Figure 4. *Erg* and *Fli1* depletion in LEC does not compromise blood vessel permeability

**A**, Diagram of Tmx administration for three consecutive days and intravenous injection of Evans blue (1%, 50  $\mu$ l) via the tail vein for assessing blood vessel leakage in the mesentery of WT and *Erg/Fli1*<sup>ΔLEC</sup> mice at 2 weeks post-injection of initial Tmx.

**B**, Images of Evans blue fluorescence (red signal) in the mesenteric vasculatures (yellow and red arrowheads) beneath adipocytes (white arrows) of WT and *Erg/Fli1*<sup>ΔLEC</sup> mice at the indicated time points after Evans blue injection. Scale bars, 100  $\mu$ m.

**C**, Comparison of Evans blue fluorescence intensity (FI) in the mesenteric vessels and adjacent regions at the indicated time points. Dots and bars indicate mean  $\pm$  SD and  $n$  = 5 mice/group from two independent experiments.  $P$  value versus WT by two-tailed Mann-Whitney  $U$  test.



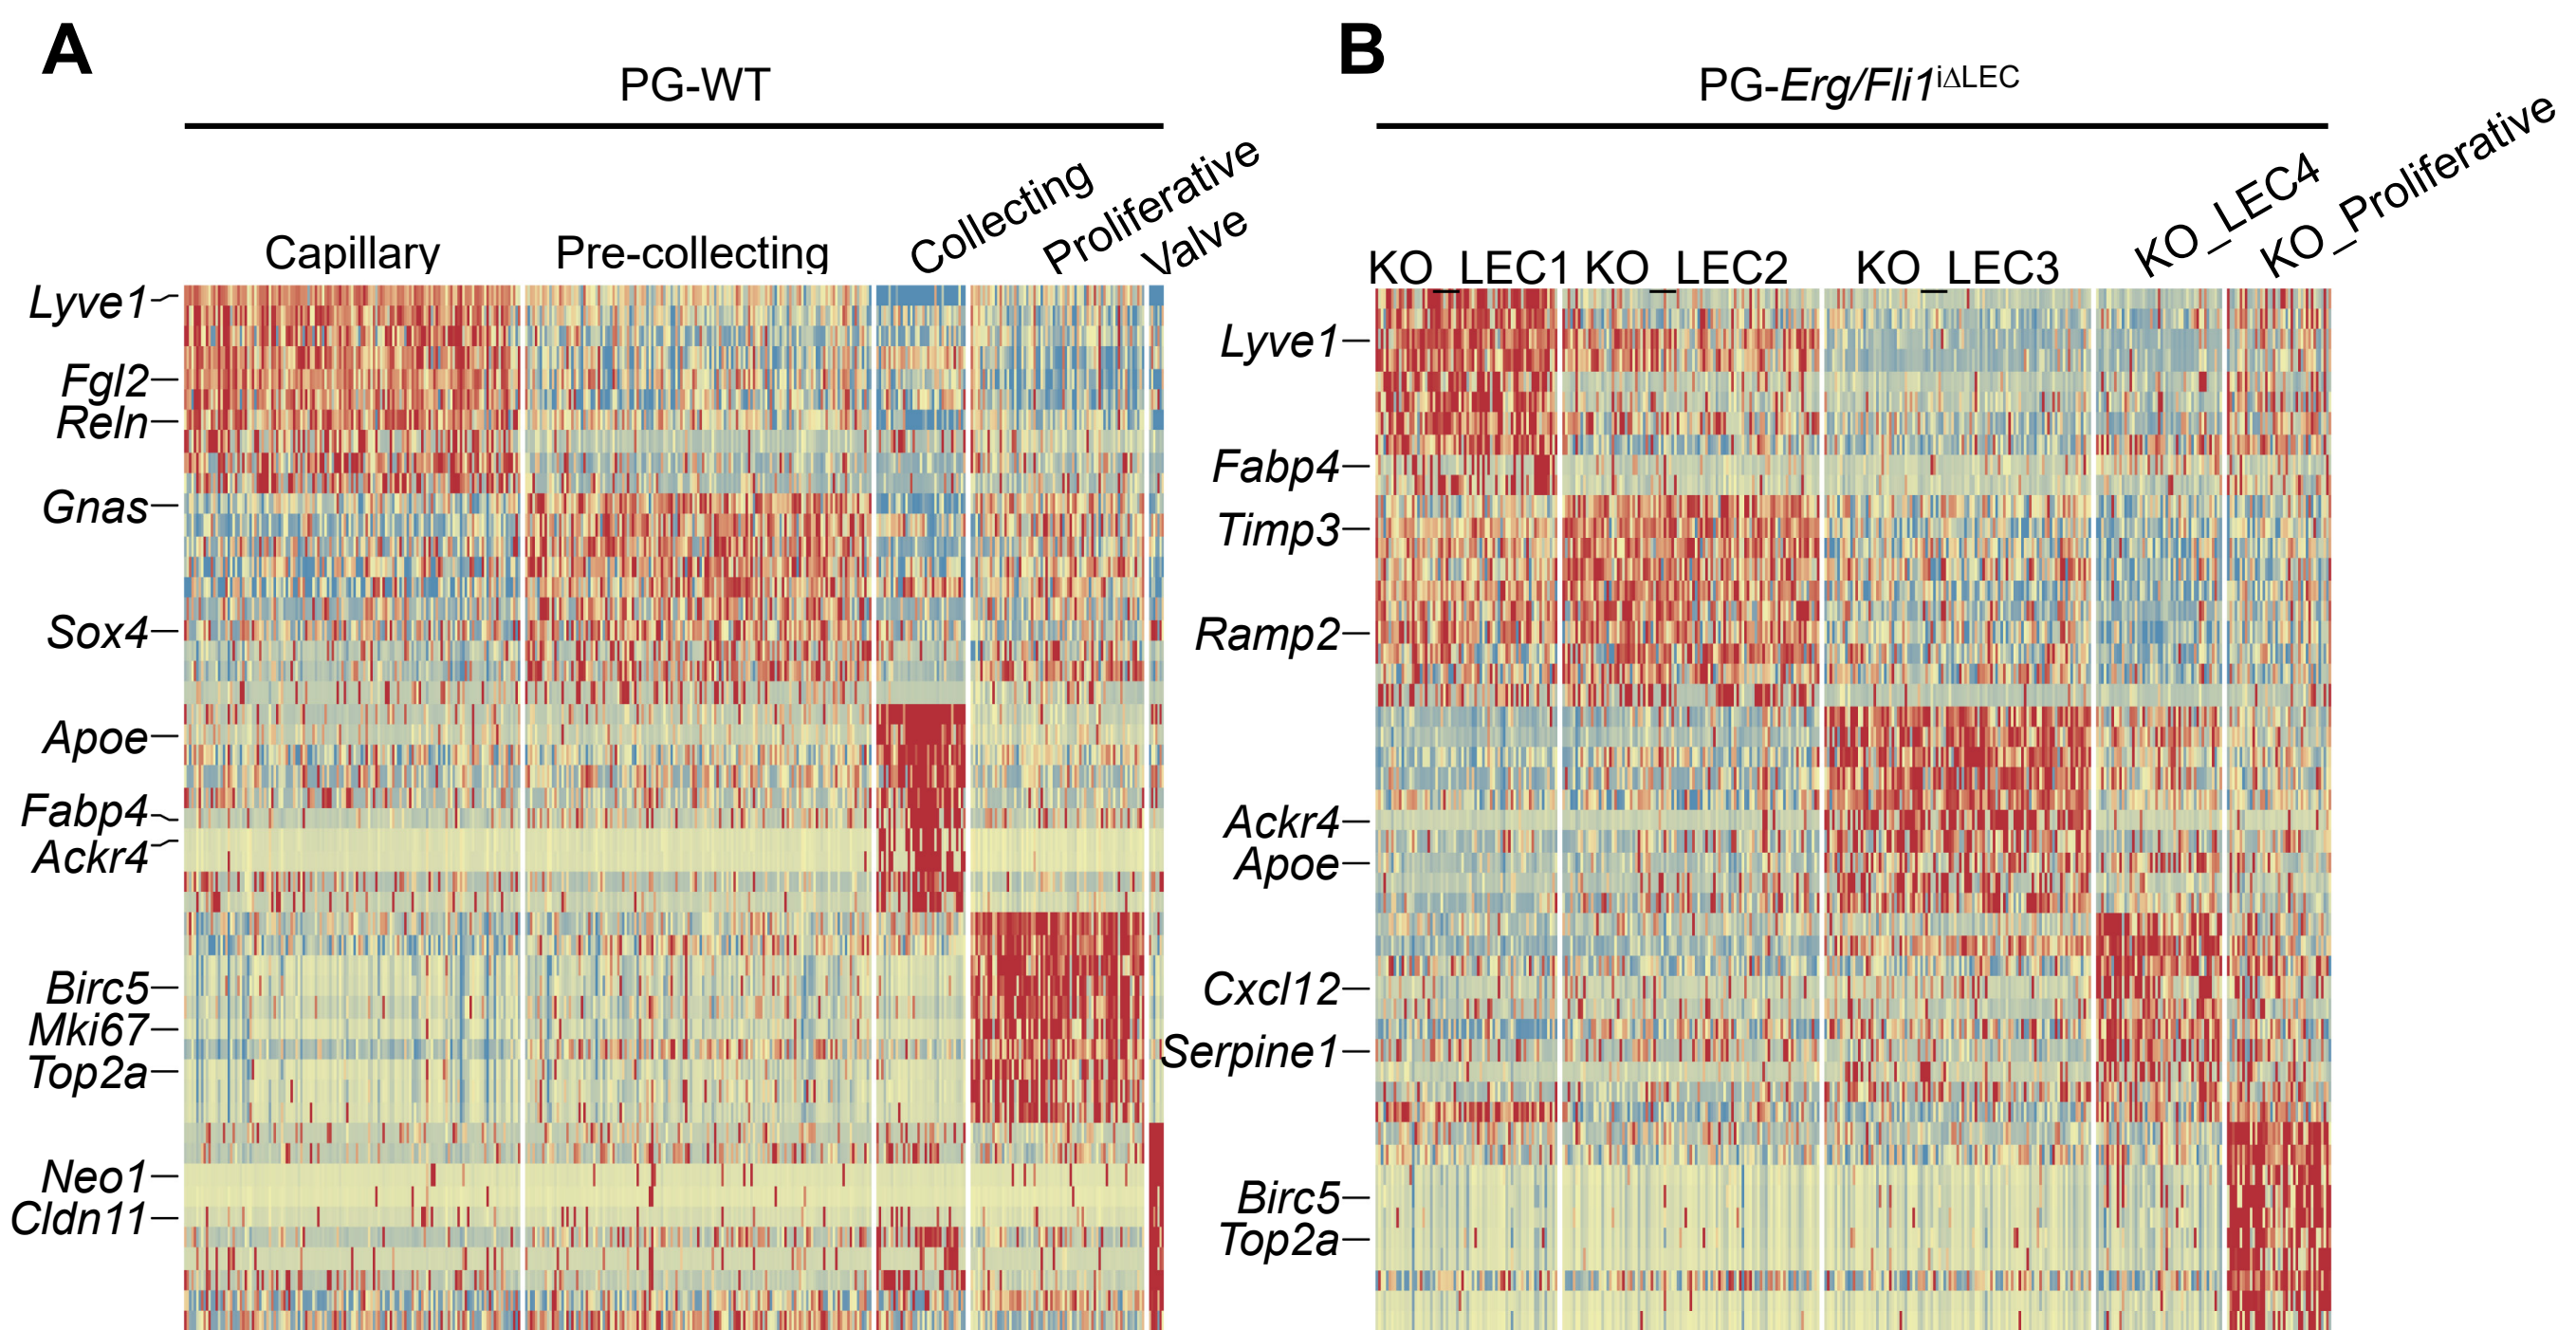

**Supplemental Figure 5. Distinct transcriptomic profiles of mesenteric lymphatic subtypes in PG-WT or PG-*Erg/Fli1*<sup>ΔLEC</sup> mice**

**A,B**, Heatmap visualizing scaled expression levels of top 10 differentially expressed genes in indicated clusters of mesenteric LEC in PG-WT (**A**) or PG-*Erg/Fli1*<sup>ΔLEC</sup> mice (**B**) at 2 weeks after the first Tmx injection.



**A**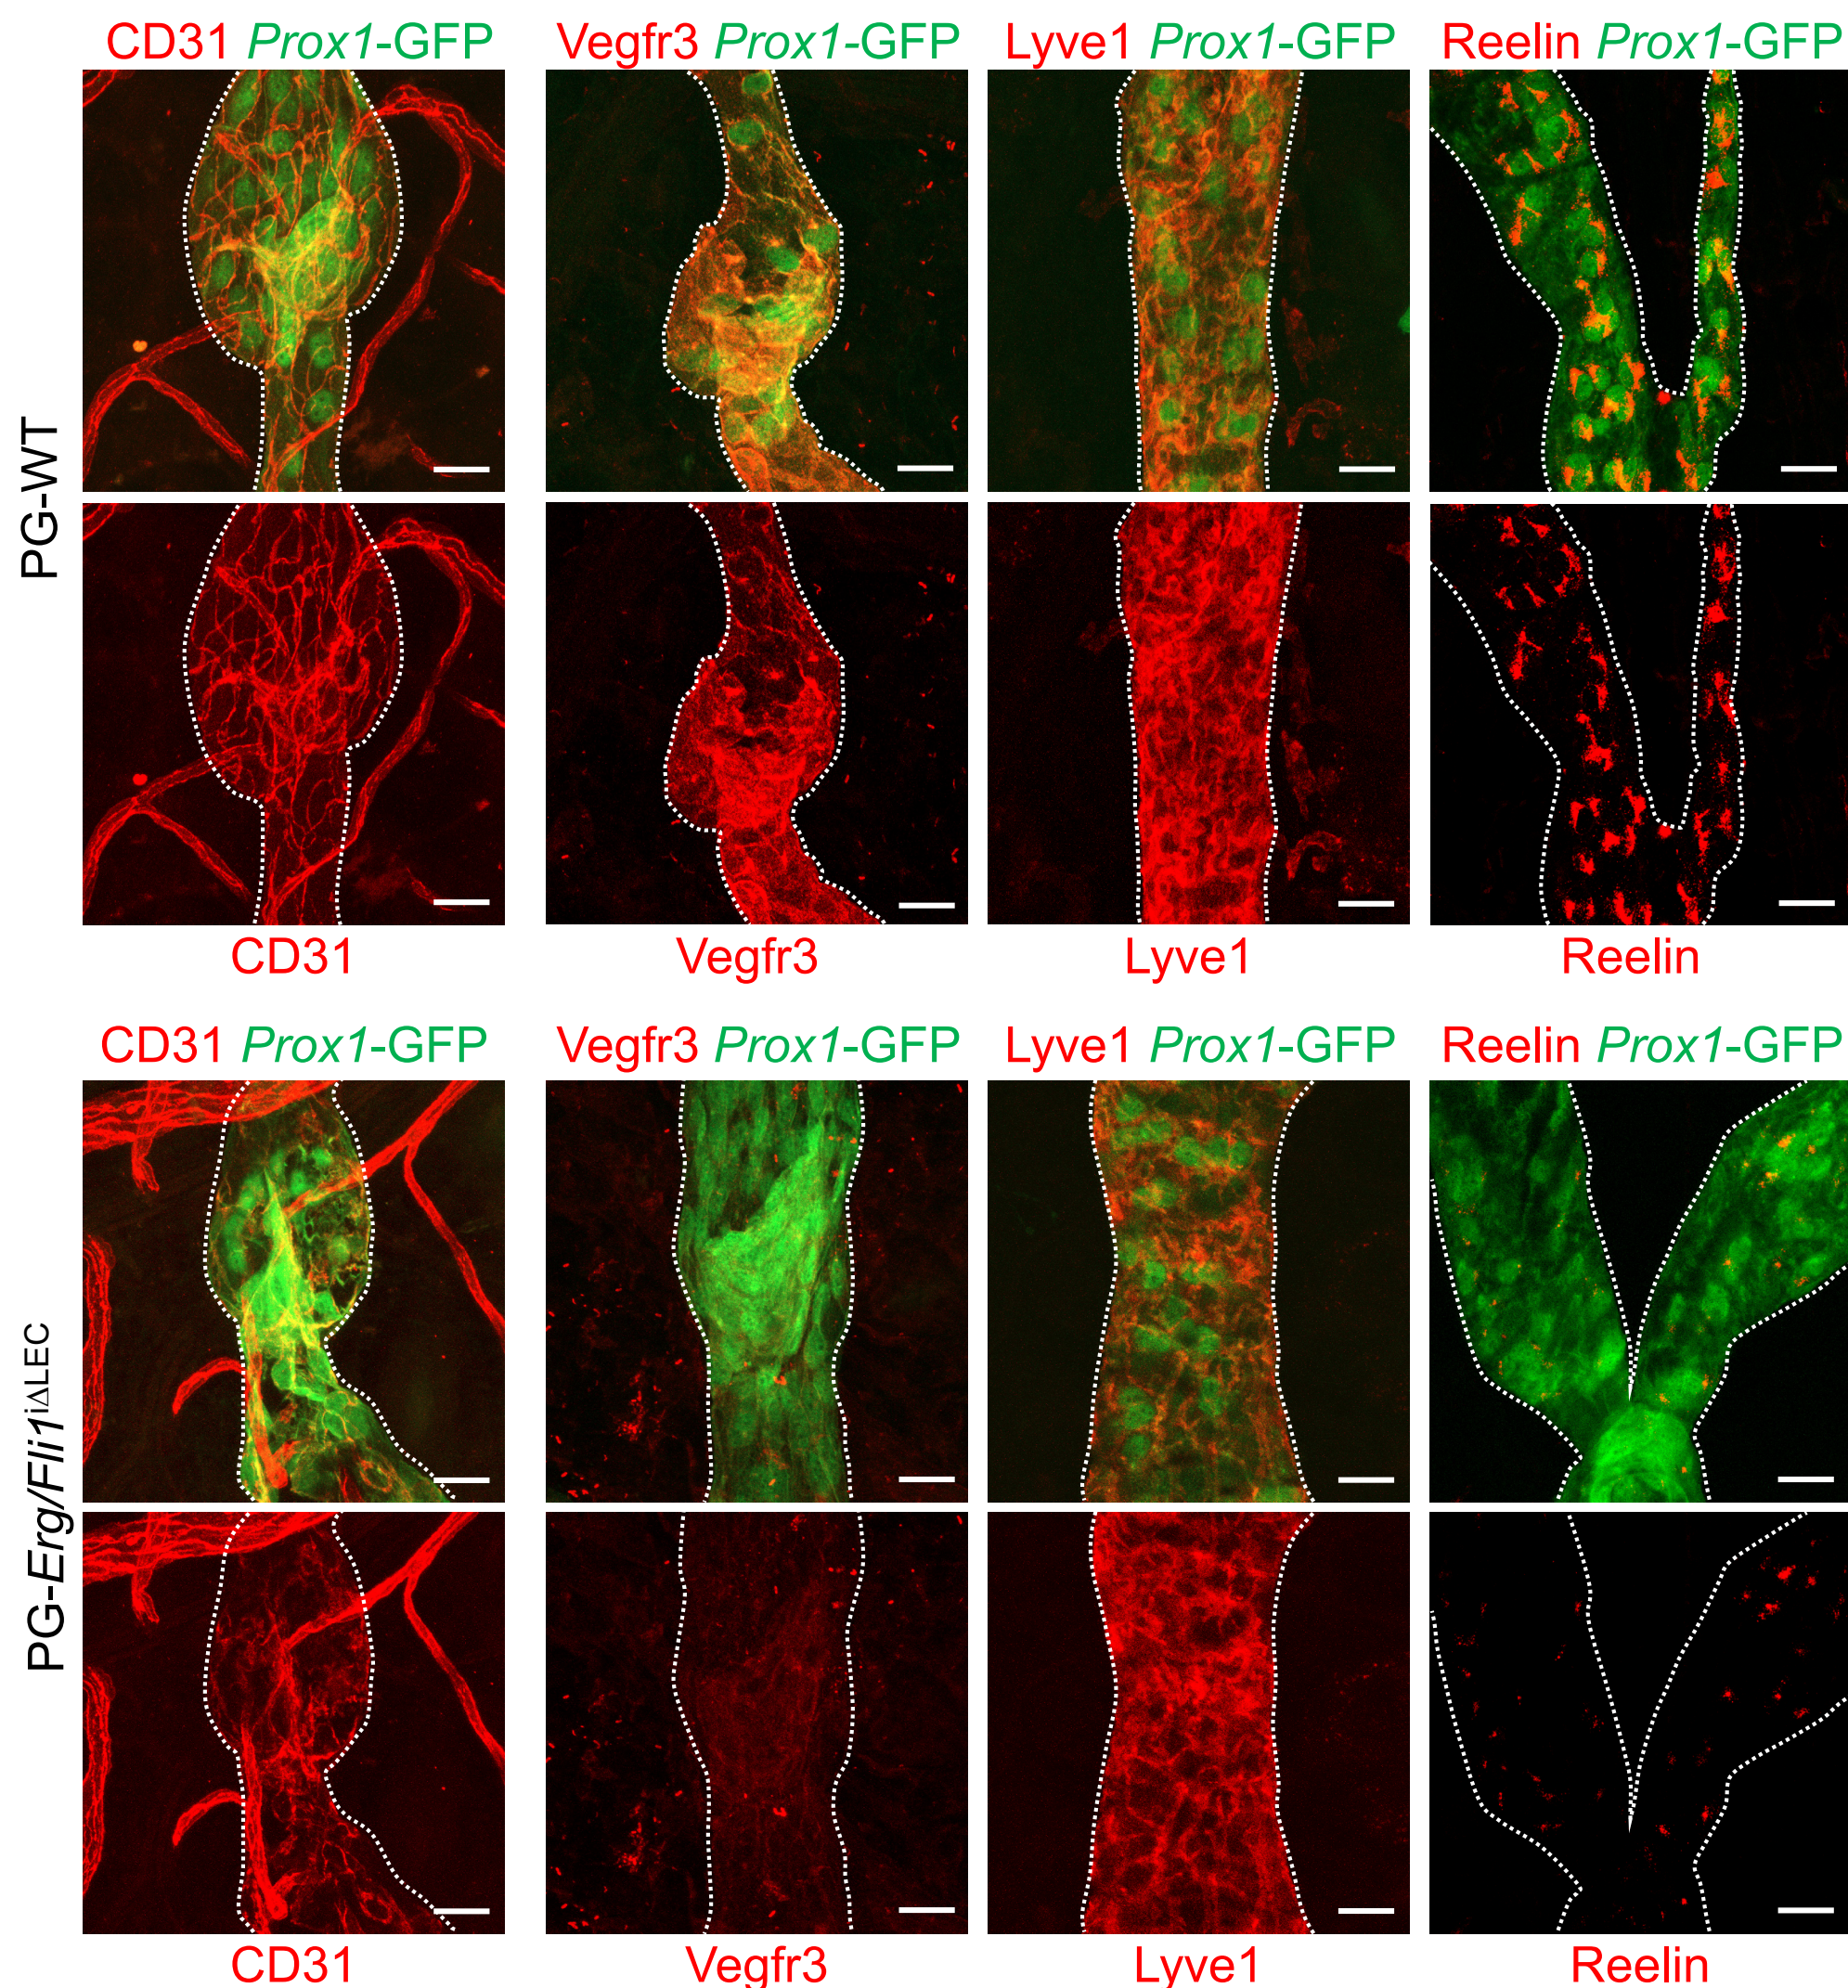**B**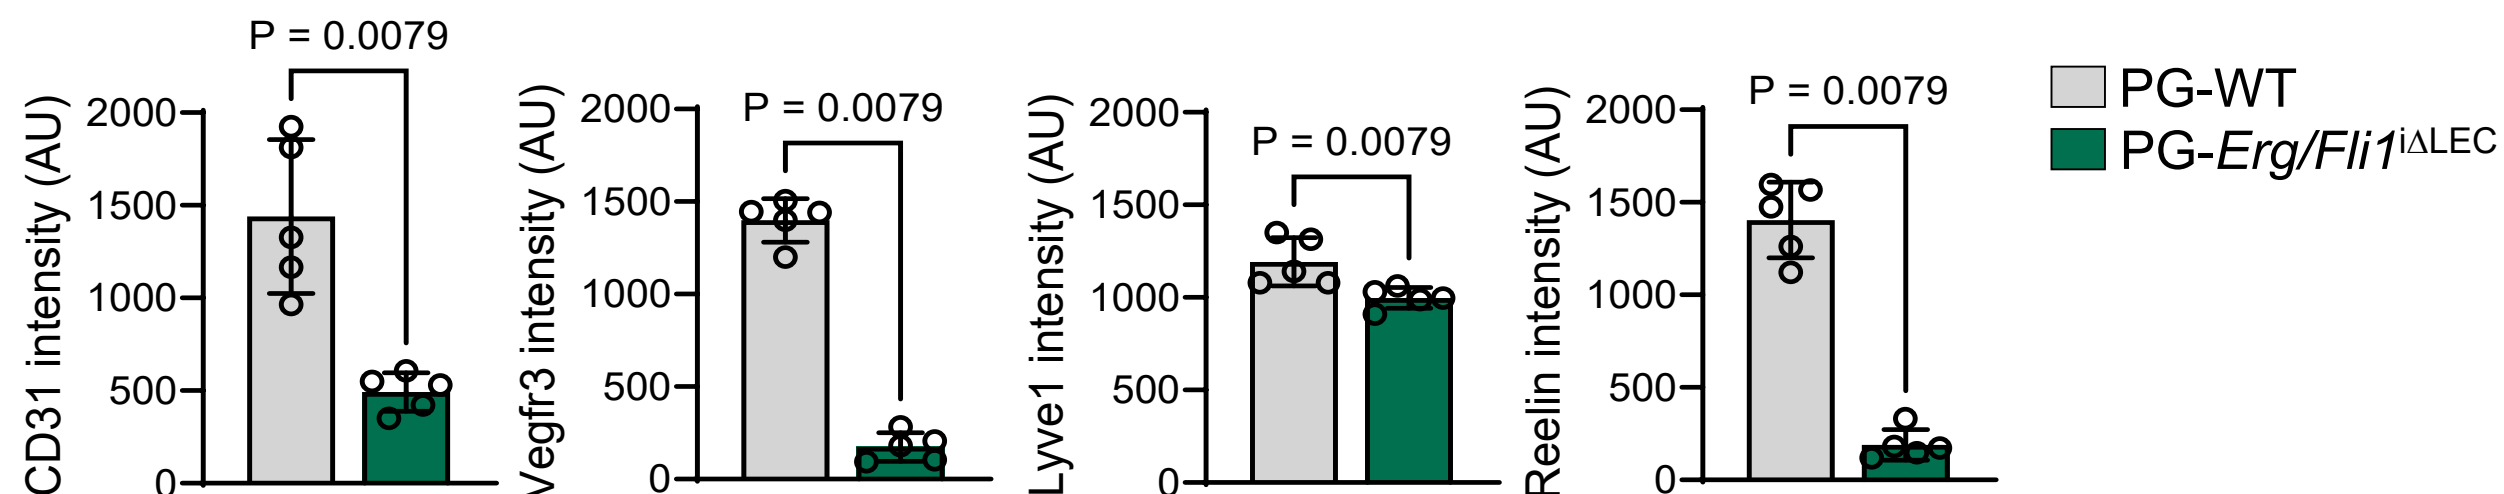

### Supplemental Figure 6. Lymphatic signature proteins are reduced in the lymphatics of *Erg/Fli1*<sup>ΔLEC</sup> mice

**A, B,** Representative images and comparisons of protein levels of CD31, Vegfr3, Lyve1, and Reelin in the ear skin dermal lymphatics between PG-WT and PG-*Erg*/*Fli1*<sup>ΔLEC</sup> mice at 2 weeks after the first Tmx injection. Scale bars, 50  $\mu$ m. Each dot indicates a value from one mouse and n = 5 mice/group from two independent experiments. Bars indicate mean  $\pm$  SD and *P* value versus WT by two-tailed Mann-Whitney *U* test.



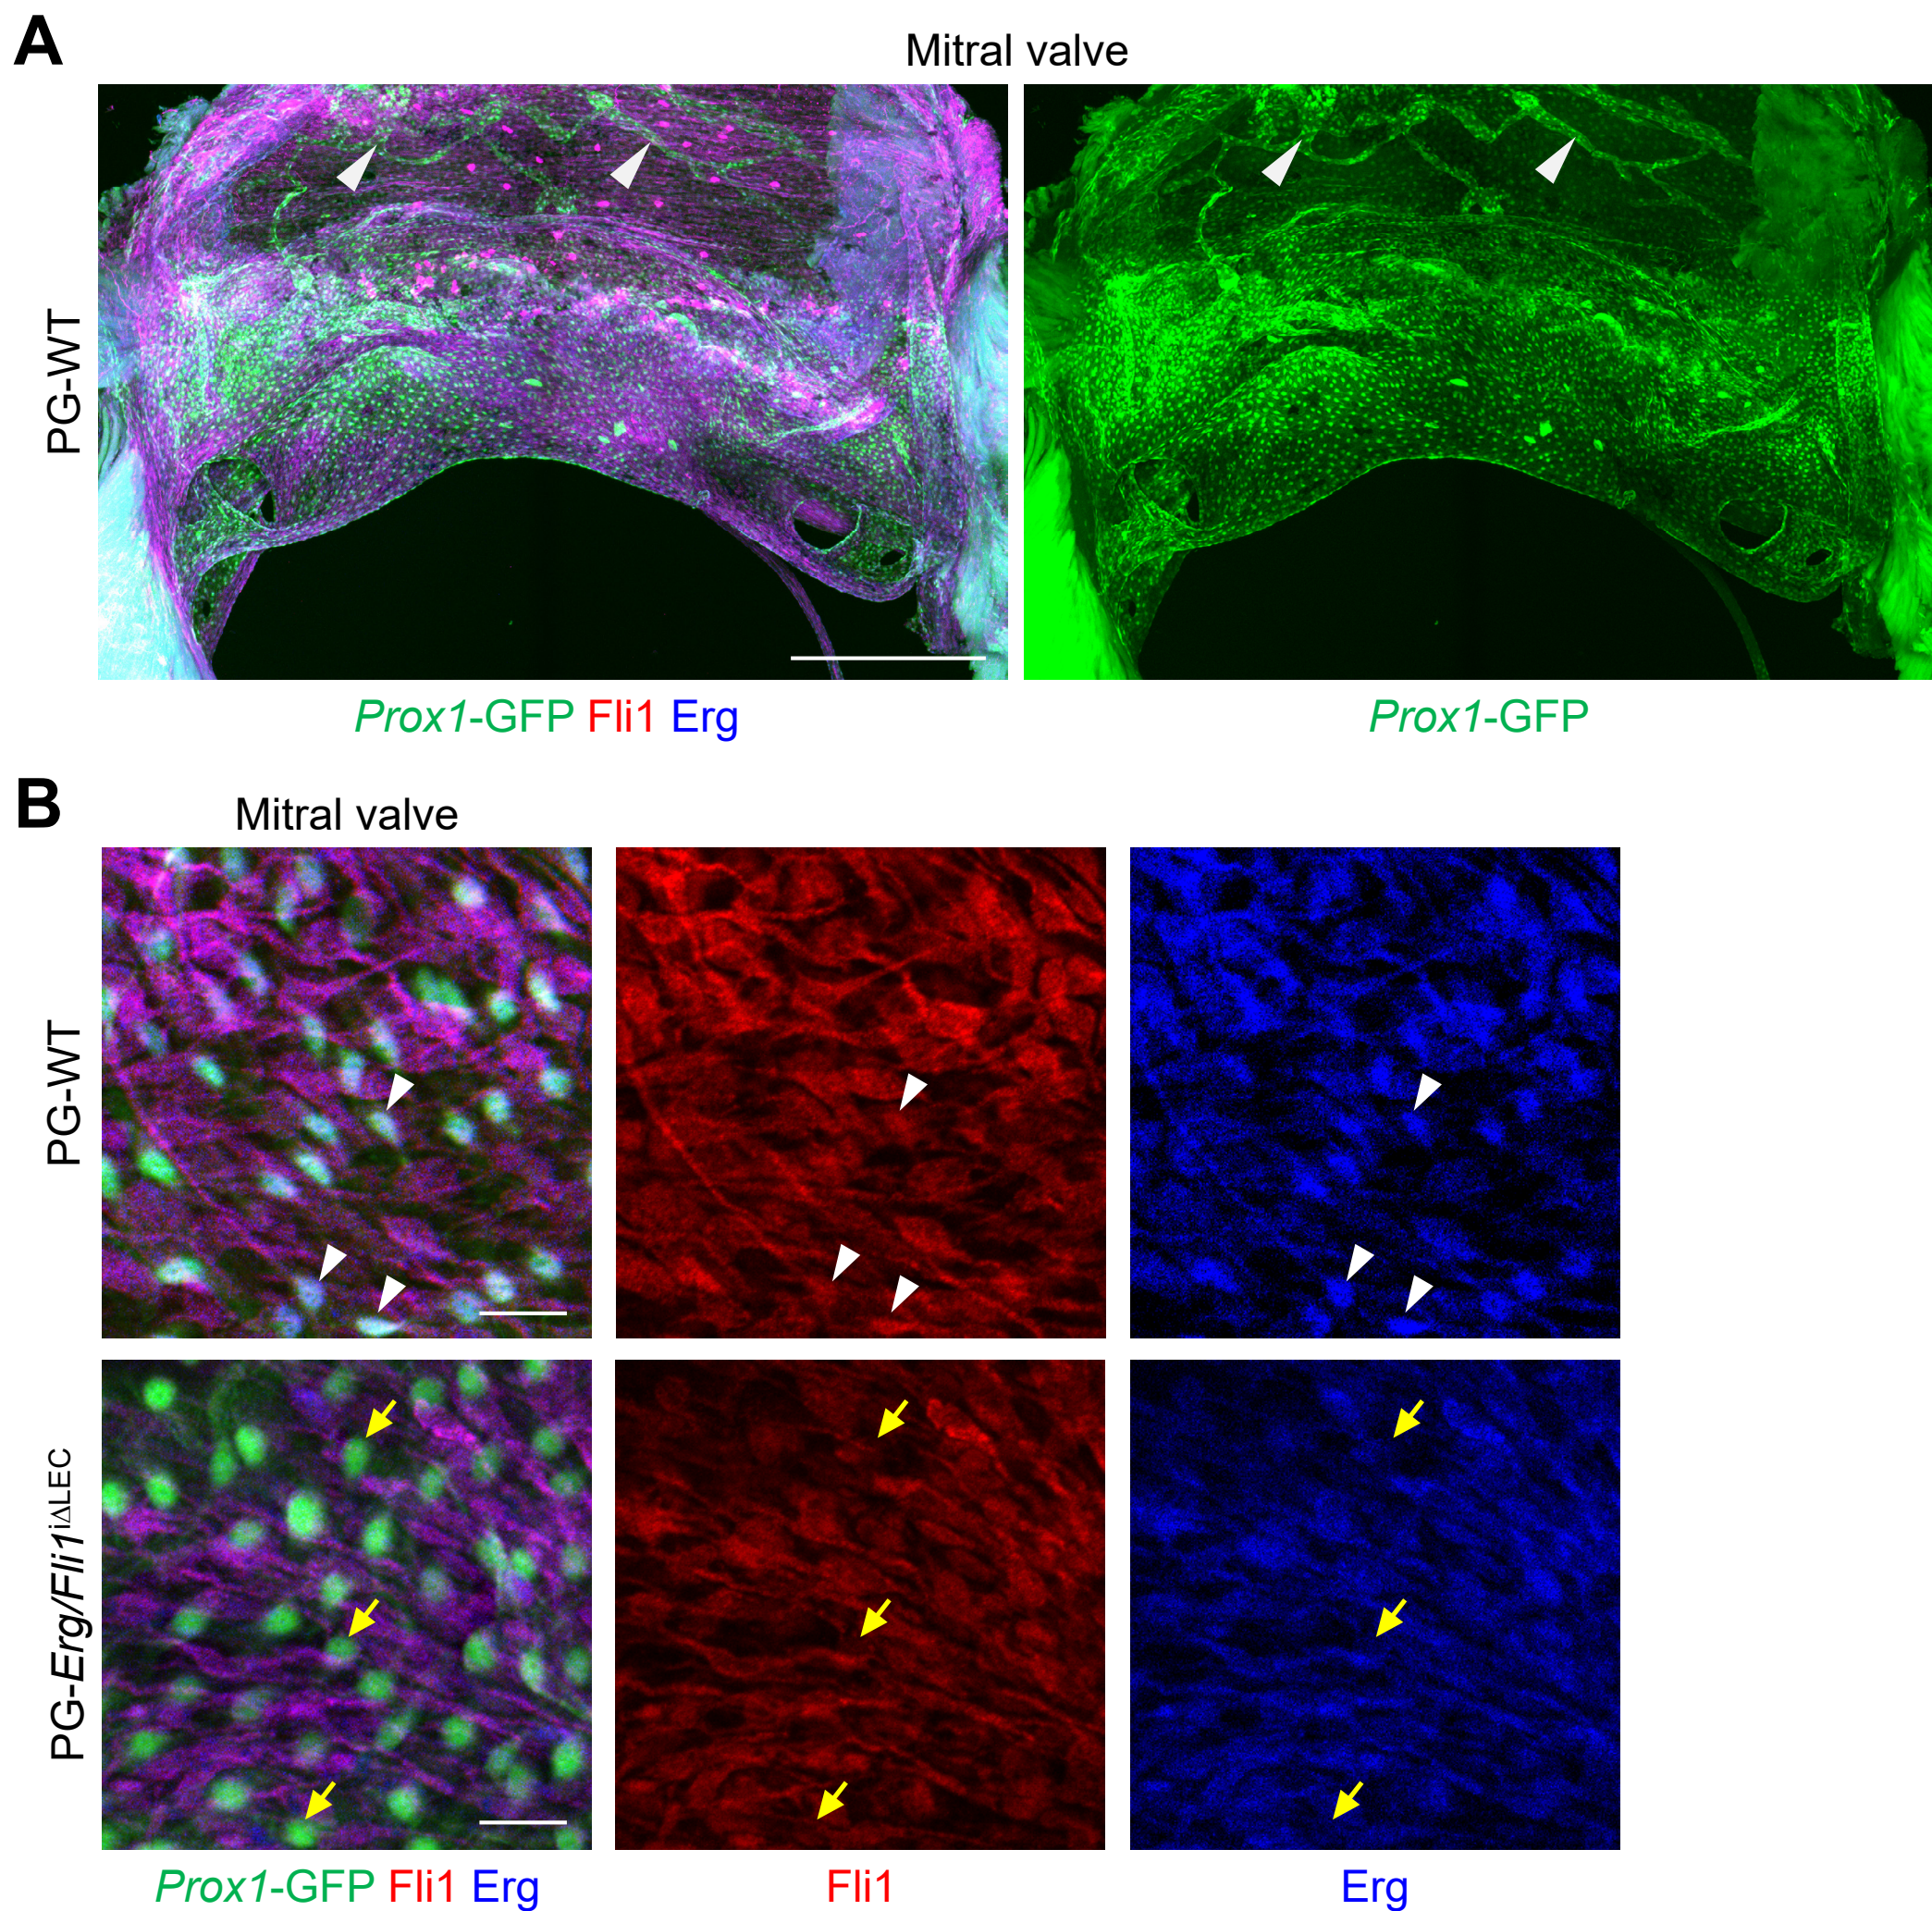

### Supplemental Figure 7. *Prox1*<sup>+</sup> cardiac valvular cells express *Erg* and *Fli1*

**A**, Immunofluorescence images of whole-mounted cardiac valve (mitral valve) in adult PG-WT mice. Cardiac valvular cells express *Prox1*. Note that *Prox1*<sup>+</sup> lymphatics are present in the leaflet surface near the annulus area of the mitral valve (white arrowheads). Similar findings are shown from *n* = 5 mice/group from two independent experiments. Scale bars, 500  $\mu$ m.

**B**, Immunofluorescence images of protein levels of *Erg* and *Fli1* in whole-mounted cardiac valve (mitral valve) of PG-WT and PG-*Erg*/*Fli1*<sup>ΔLEC</sup> mice at 2 weeks after the first Tmx injection. *Erg* and *Fli1* are expressed in *Prox1*<sup>+</sup> cardiac valvular cells (white arrowheads). *Erg* and *Fli1* were depleted in *Prox1*<sup>+</sup> cardiac valvular cells in PG-*Erg*/*Fli1*<sup>ΔLEC</sup> mice (yellow arrows). Similar findings are shown from *n* = 5 mice/group from two independent experiments. Scale bars, 25  $\mu$ m.



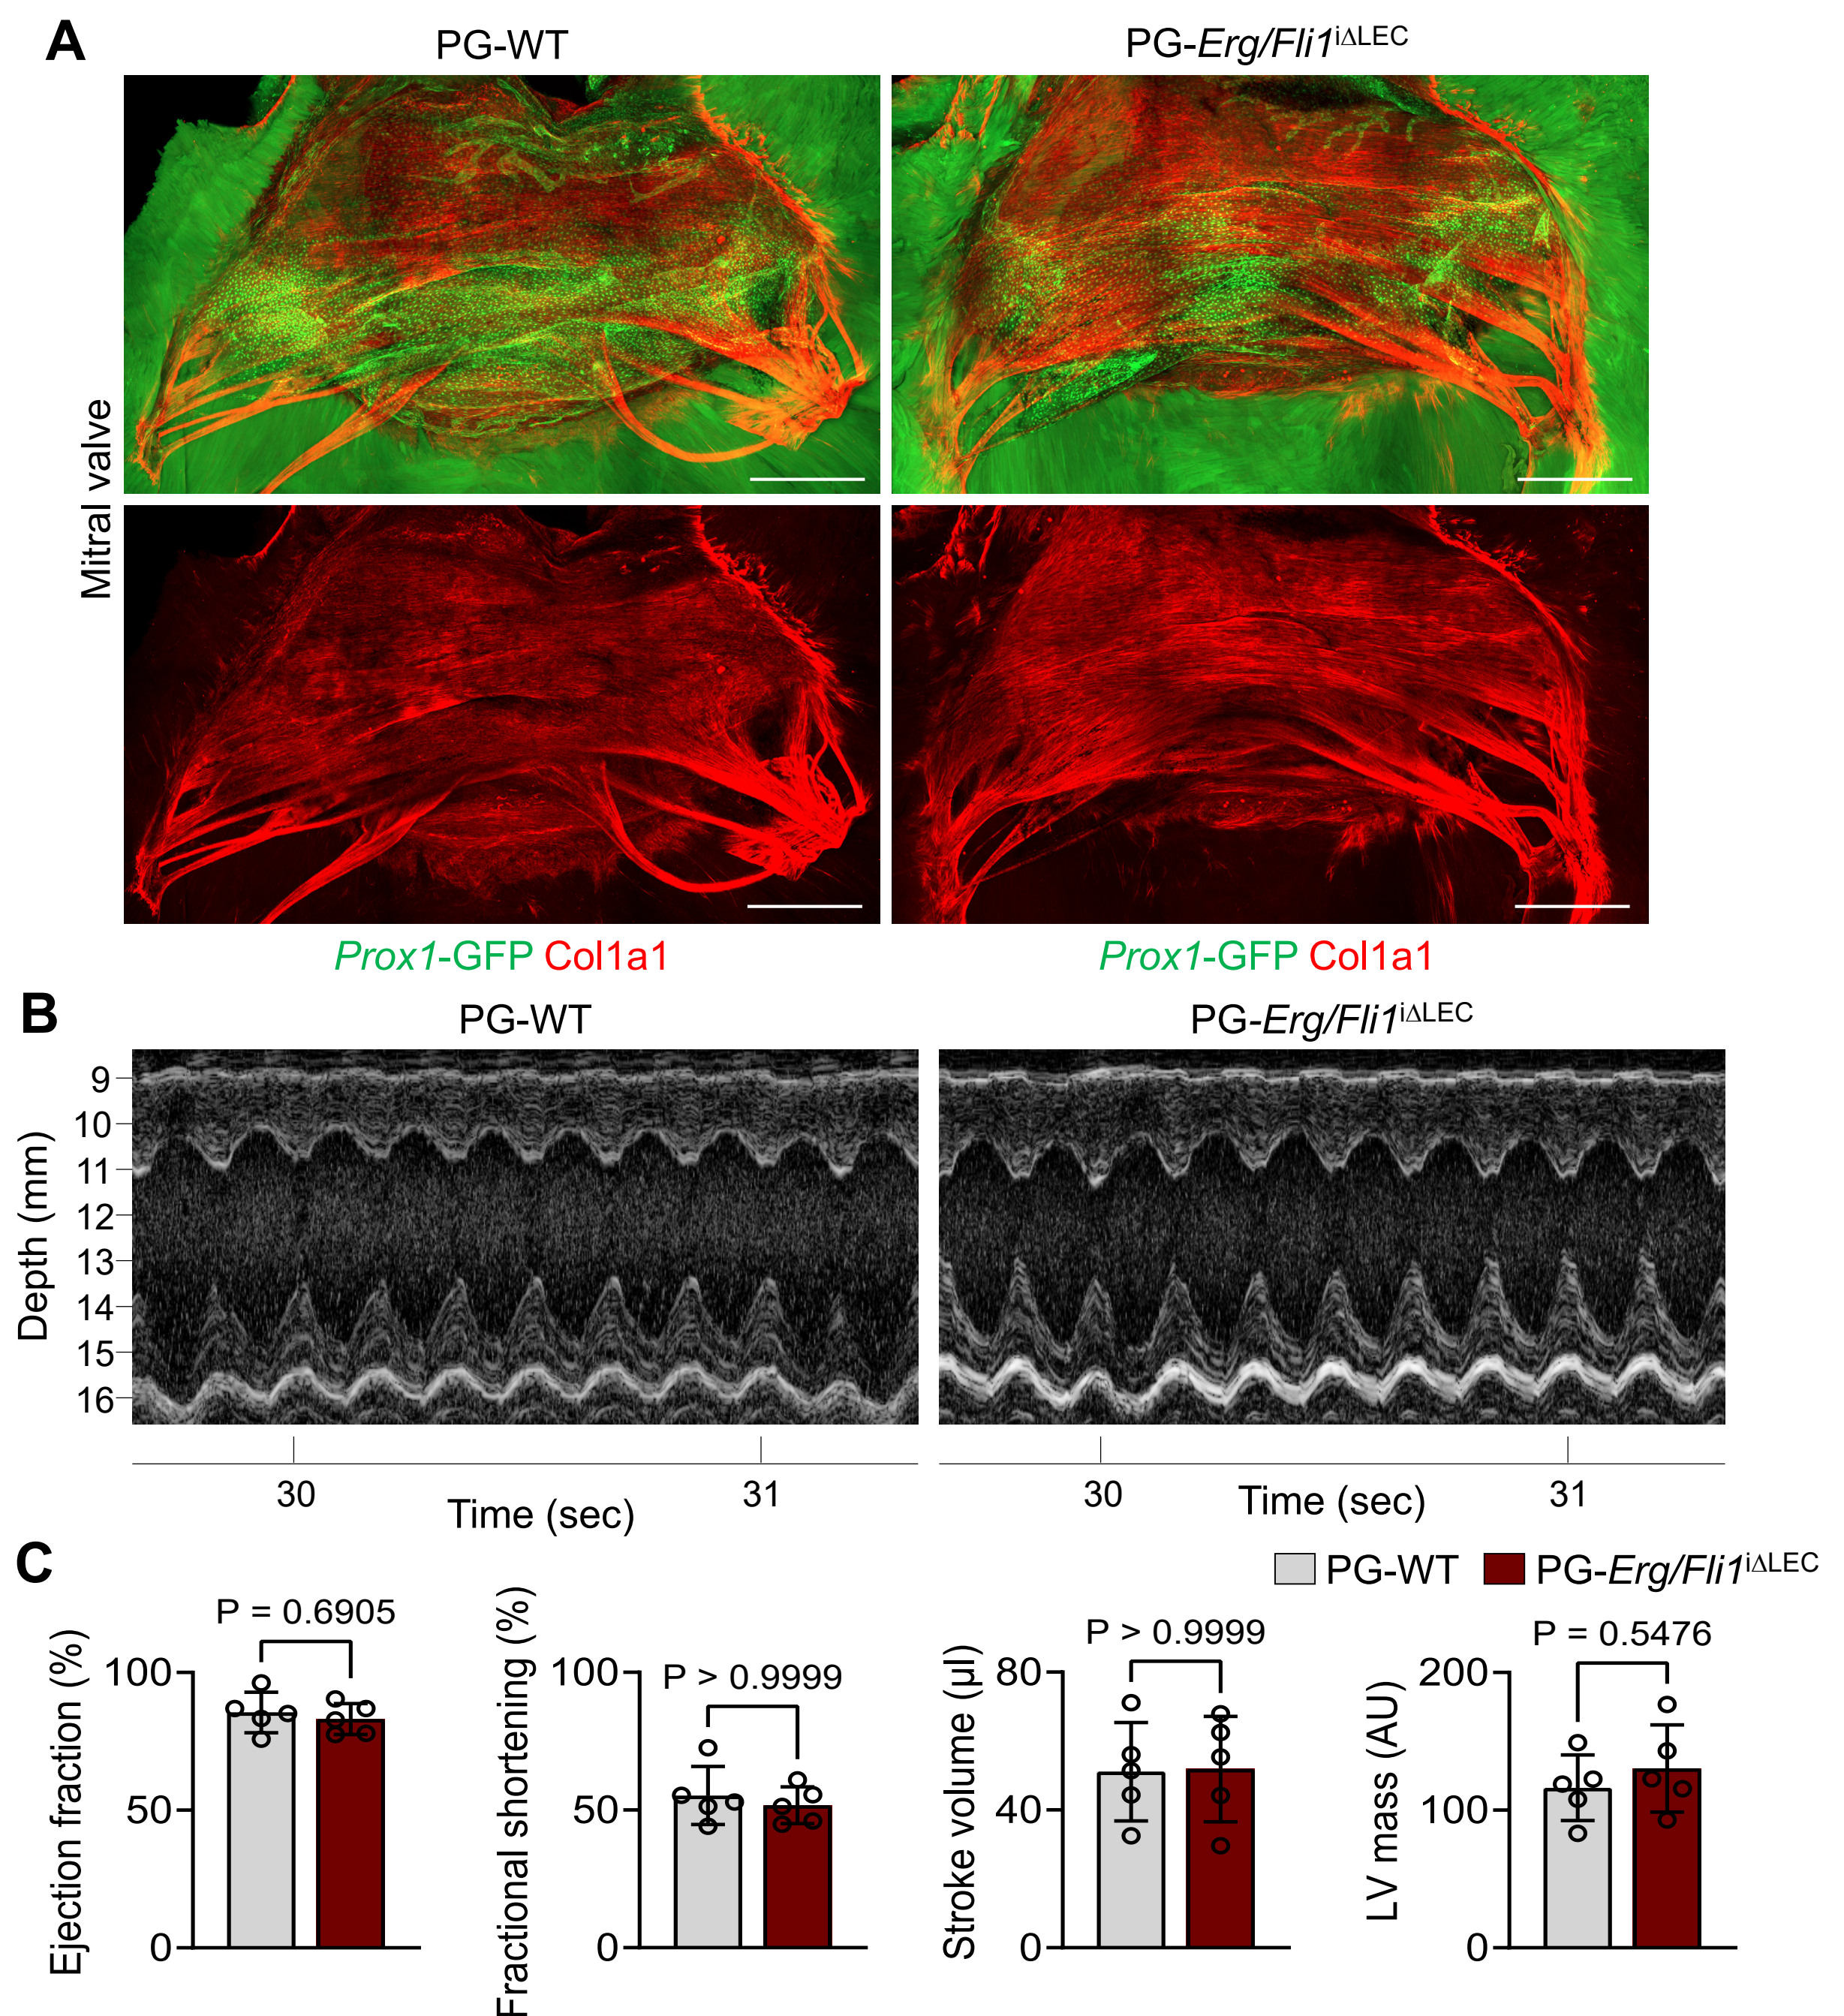

### Supplemental Figure 8. No difference in cardiac valve structure and function in *Erg/Fli1*<sup>ΔLEC</sup> mice

**A**, Immunofluorescence images showing whole-mounted cardiac mitral valve in adult PG-WT and PG-*Erg/Fli1*<sup>ΔLEC</sup> mice at 2 weeks after the first of Tmx injection. Note no difference in mitral valve structure between the two groups. Similar findings are shown from n = 5 mice/group from two independent experiments. Scale bars, 500 μm.

**B-C**, Echocardiography M-mode images showing cardiac contraction across time in adult WT and *Erg/Fli1*<sup>ΔLEC</sup> mice at 10 days after the first Tmx injection. Ejection fraction, fractional shortening, stroke volume, and left ventricle mass were measured according to M-mode images. Each dot indicates a value from one mouse and n = 5 mice/group from two independent experiments. Bars indicate mean ± SD and P value *versus* PG-WT by two-tailed Mann-Whitney U test. AU = arbitrary unit.



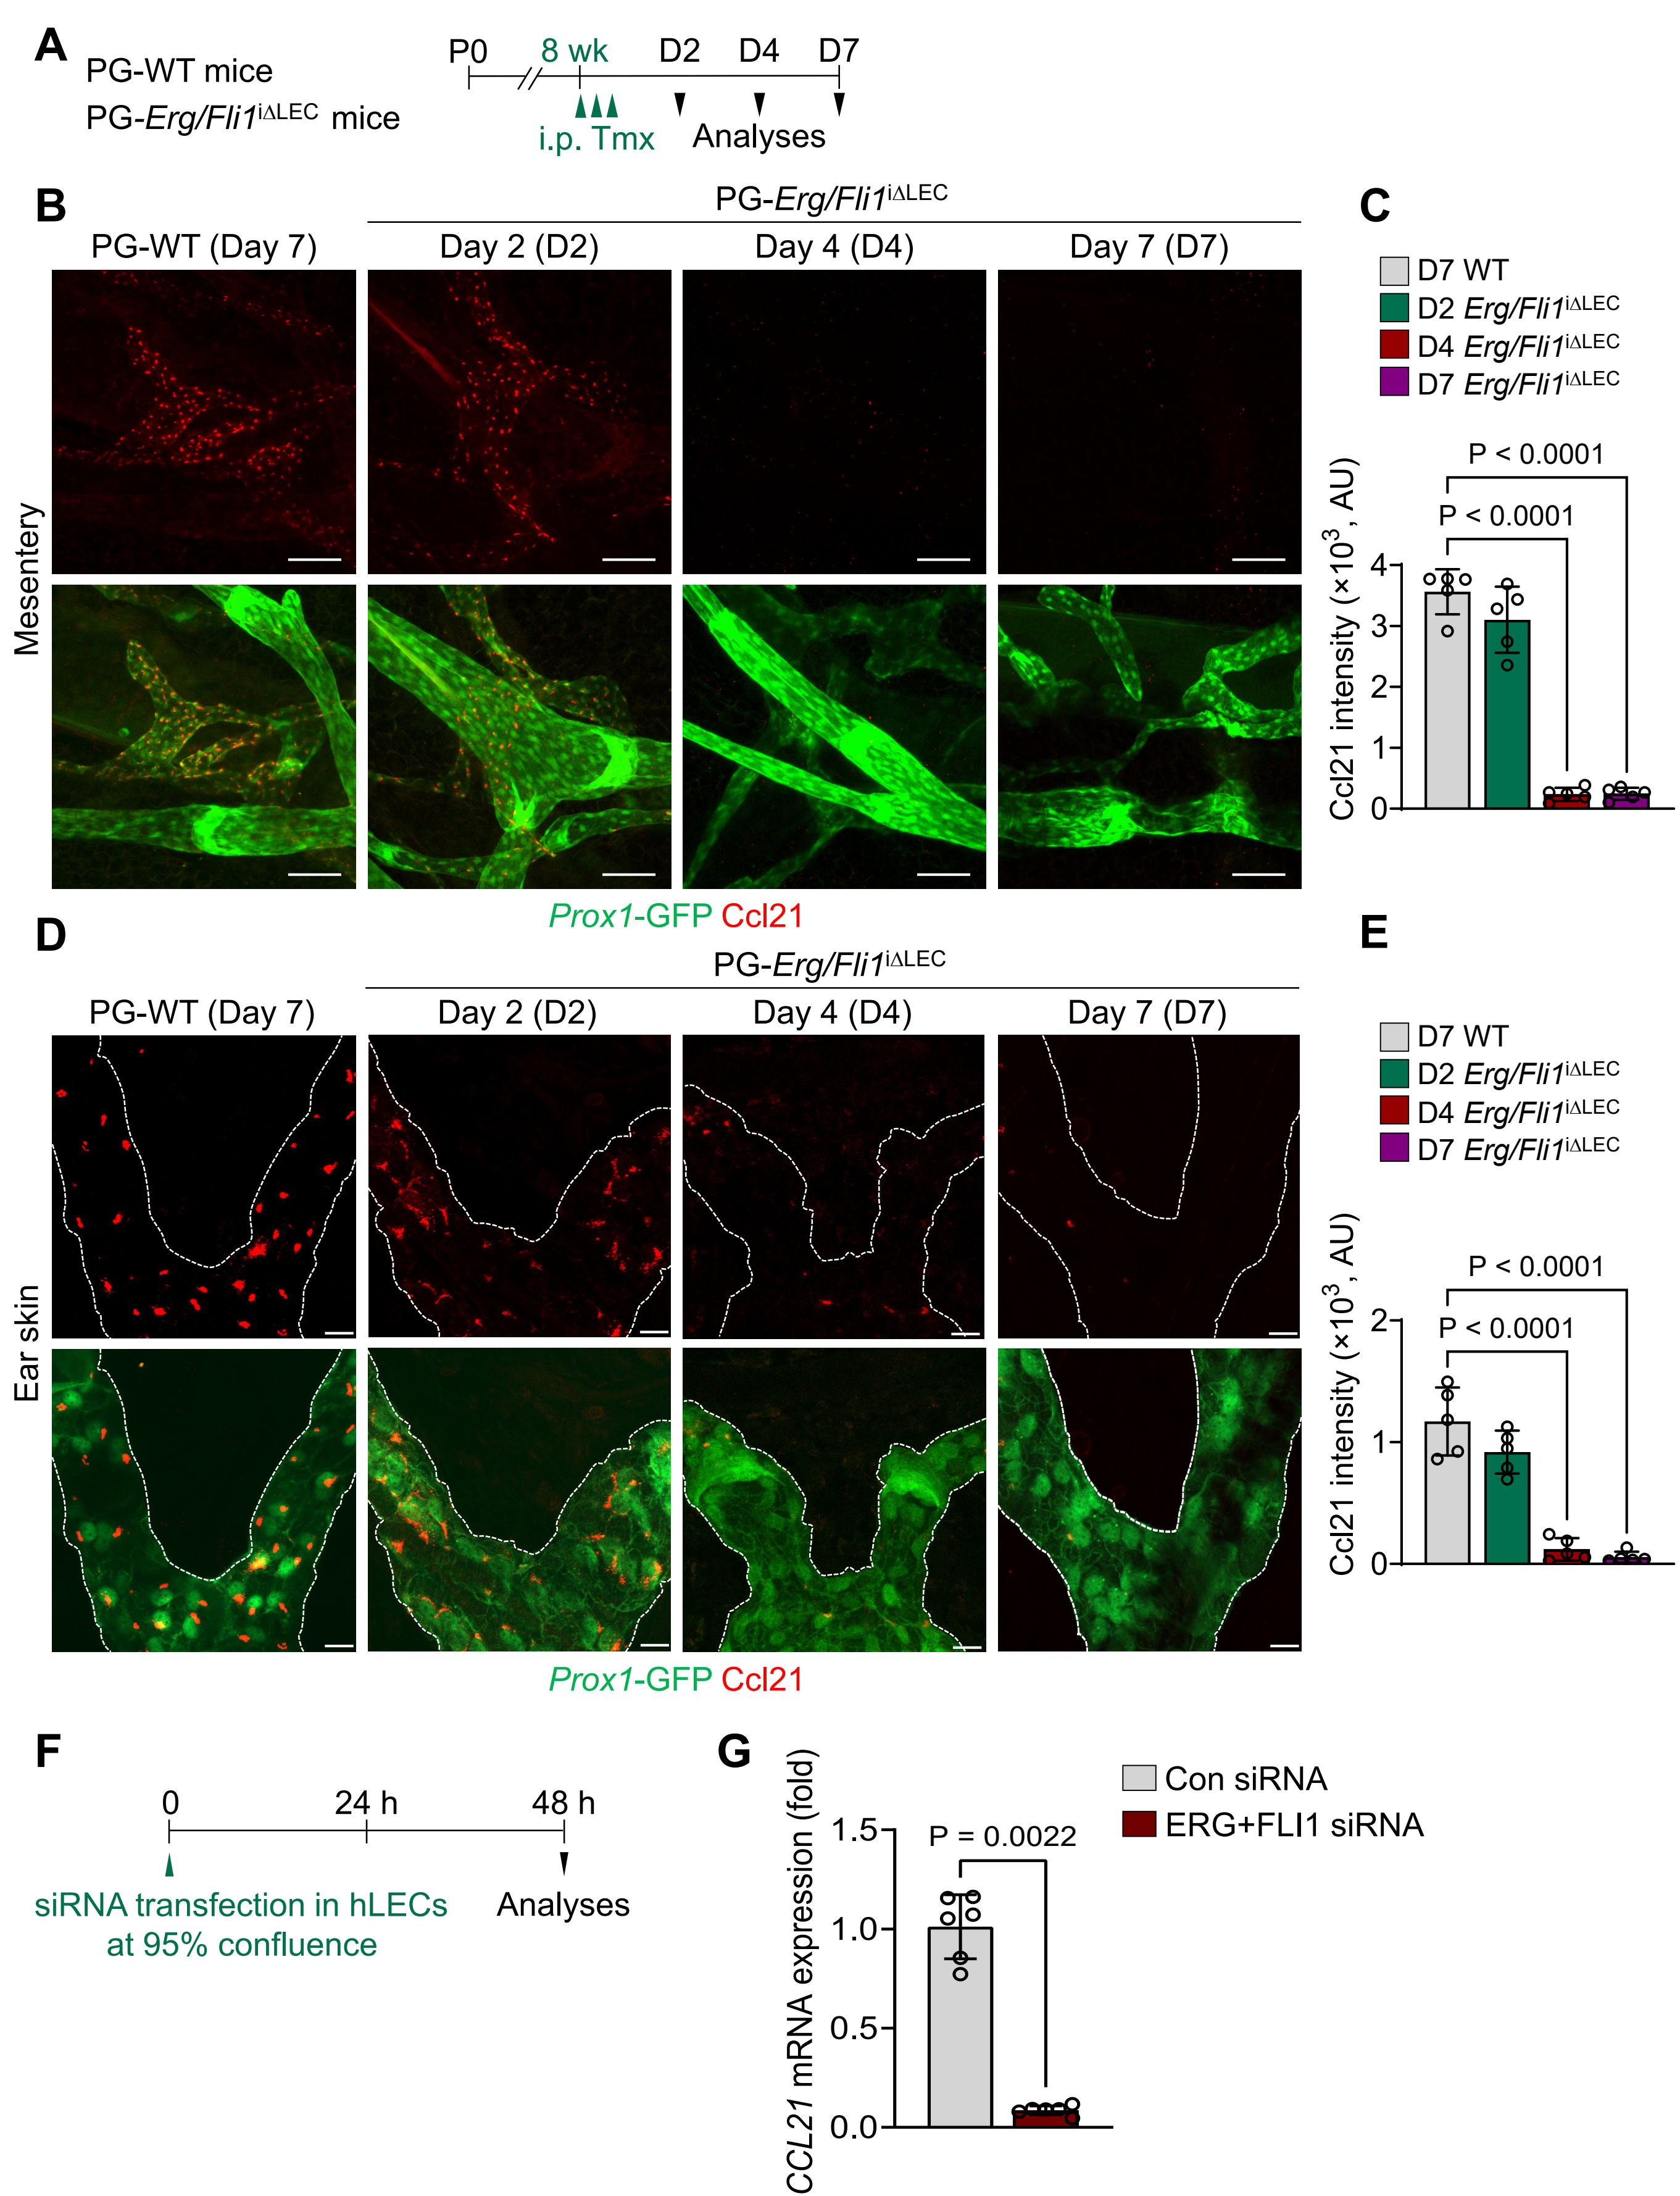



## Supplemental Figure 9. Erg and Fli1 directly regulate *Ccl21a* expression in lymphatic endothelial cells

**A-E**, (**A**) Diagram depicting intraperitoneal Tmx injections to PG-WT and PG-*Erg/Fli1*<sup>ΔLEC</sup> mice for three consecutive days and timing of analyses. (**B,C**) Immunofluorescence images and comparisons of mesenteric lymphatics and their *Ccl21* protein levels in PG-WT at day 7 and PG-*Erg/Fli1*<sup>ΔLEC</sup> mice at day 2, day 4, and day 7 after the first Tmx injection. Scale bars, 100 μm. Each dot indicates a value from one mouse and n = 5 mice/group from two independent experiments. Bars indicate mean ± SD and *P* value versus PG-WT by one-way ANOVA test followed by Tukey's *post-hoc* test.

(**D,E**) Immunofluorescence images and comparisons of ear skin lymphatics and their *Ccl21* protein levels in PG-WT at day 7 and PG-*Erg/Fli1*<sup>ΔLEC</sup> mice at day 2, day 4, and day 7 after the first Tmx injection. Scale bars, 50 μm. White dotted lines outline the ear skin lymphatics. Each dot indicates a value from one mouse and n = 5 mice/group from two independent experiments. Bars indicate mean ± SD and *P* value versus PG-WT by one-way ANOVA test followed by Tukey's *post-hoc* test.

**F,G**, Diagram depicting siRNA transfection in primary cultured human LECs (hLECs) at 95% confluency and comparisons of *CCL21* mRNA expression at 48 h after transfection between control or ERG+FLI1 siRNA. Each dot indicates a value from one sample and n = 6 samples/group from two independent experiments. Bars indicate mean ± SD and *P* value versus Control siRNA by two-tailed Mann-Whitney *U* test. AU= arbitrary unit.



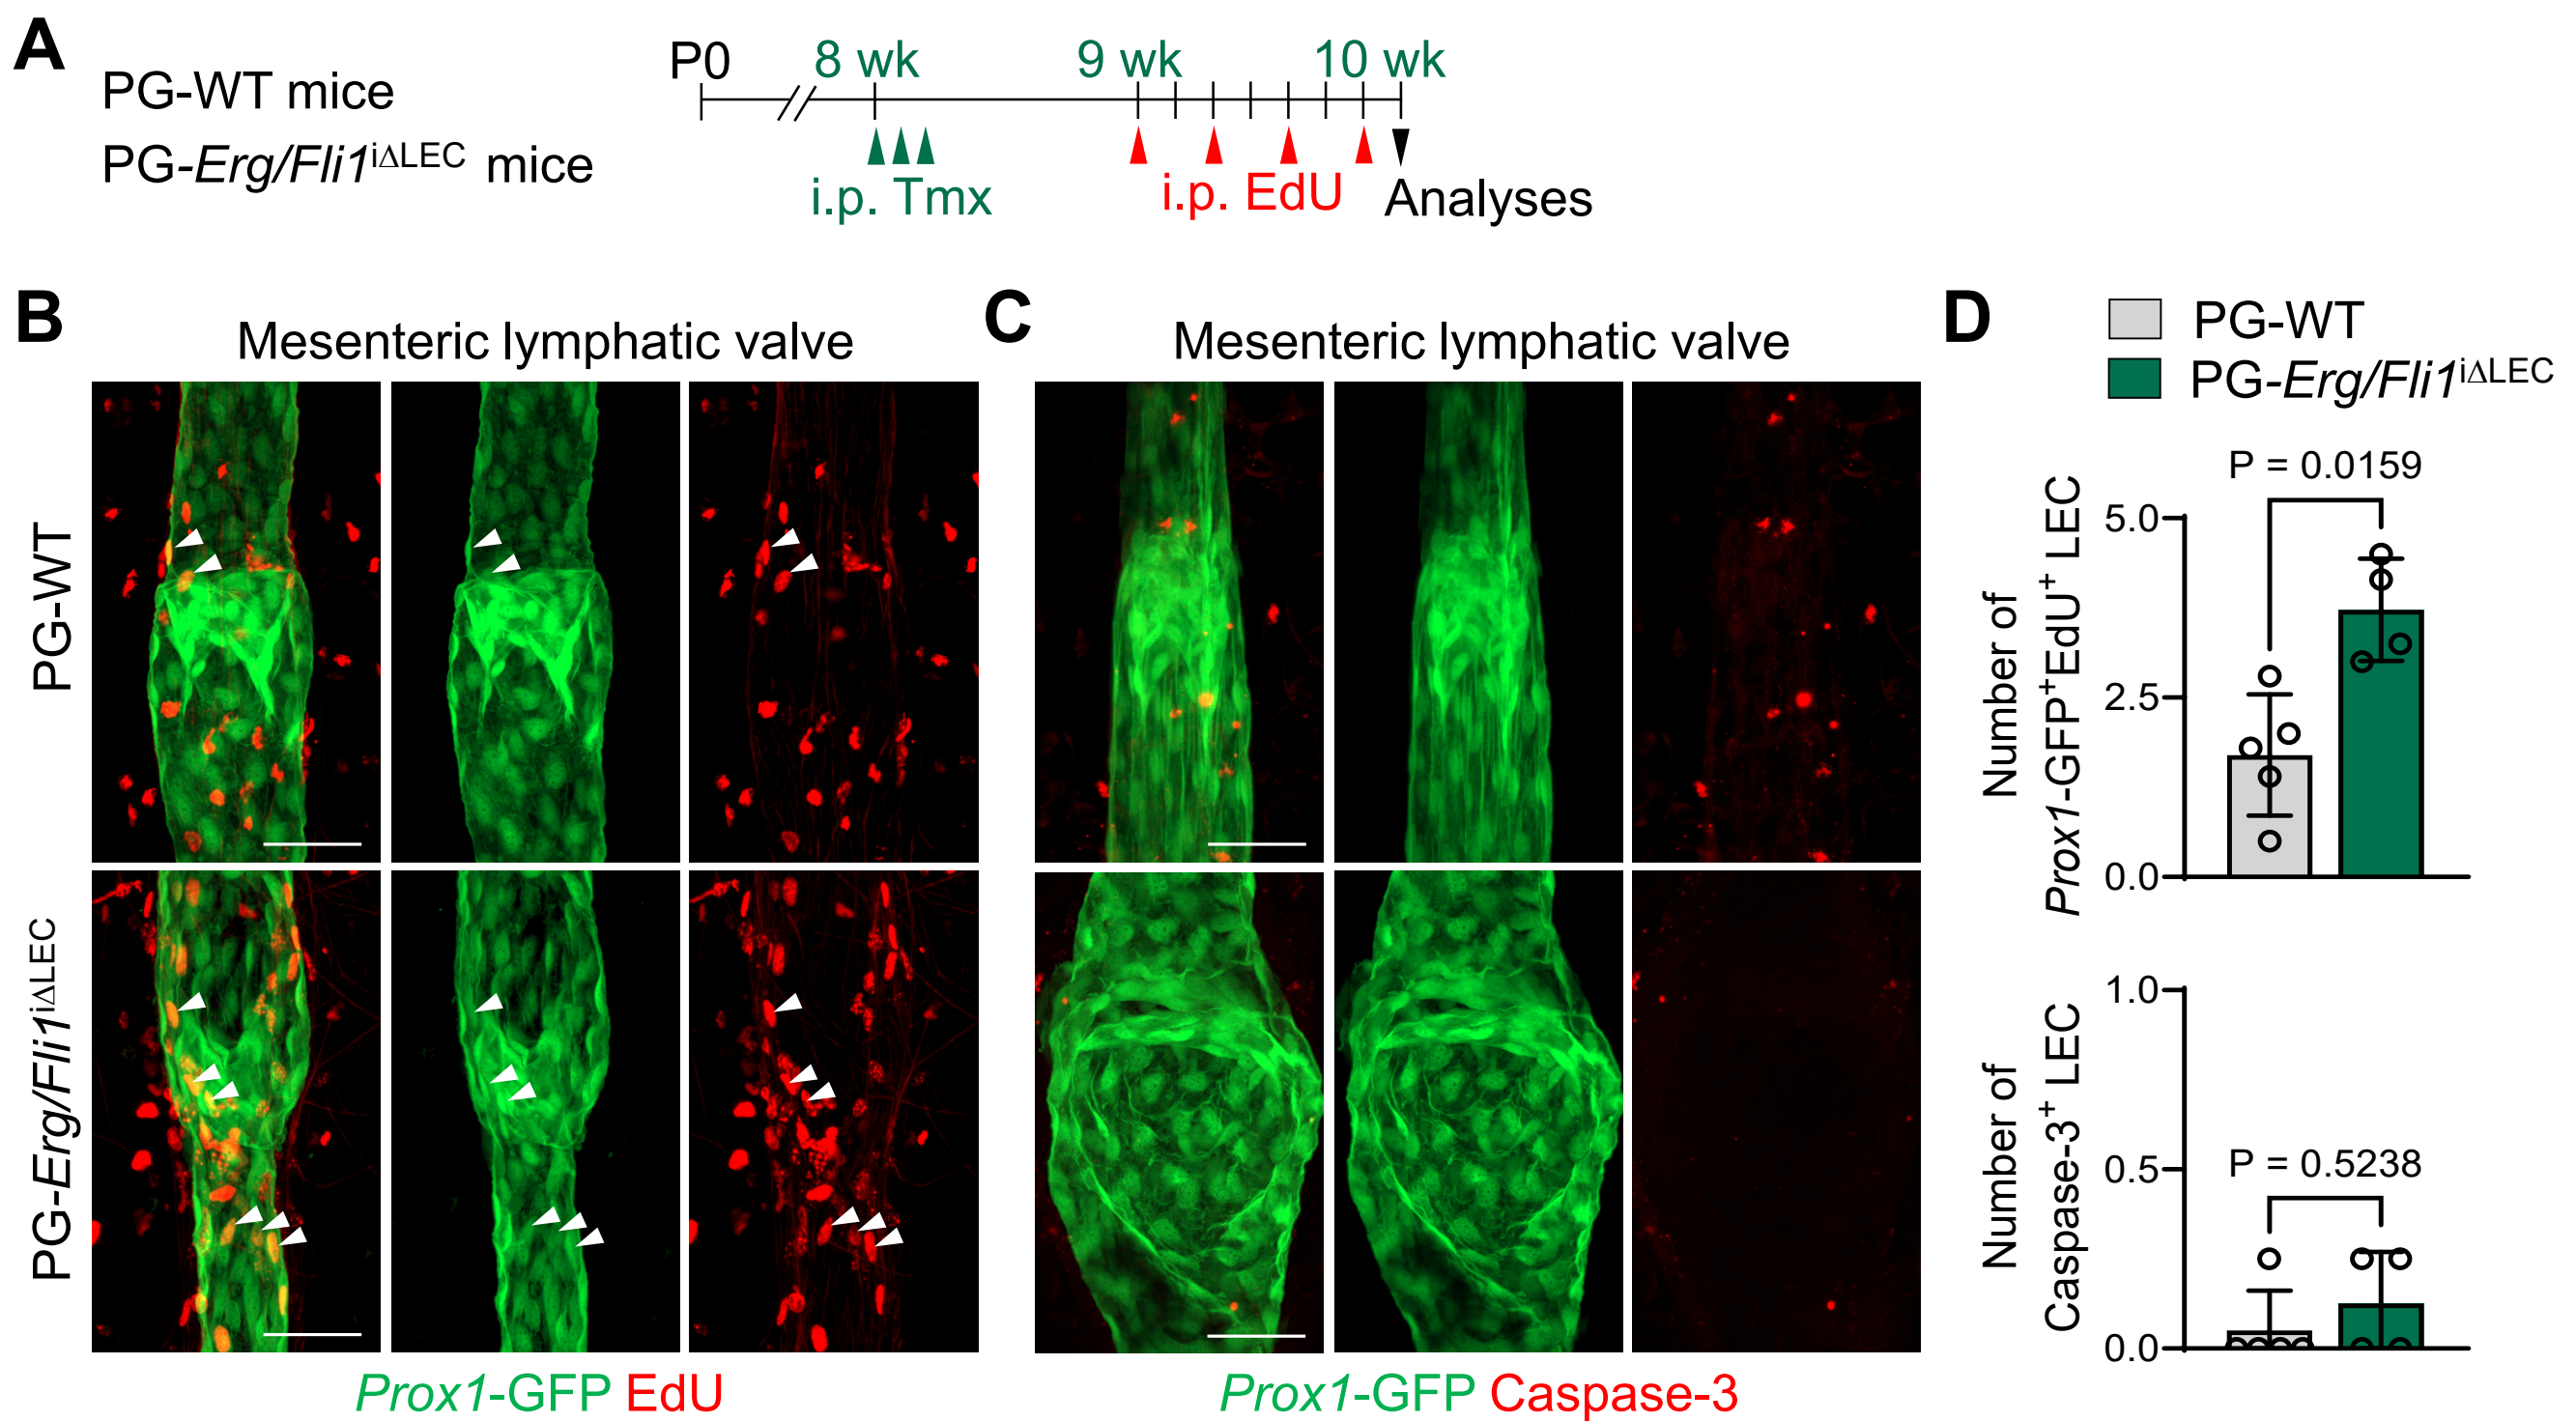

### Supplemental Figure 10. Increased proliferation of mesenteric lymphatic valve LEC in *Erg/Fli1*<sup>ΔLEC</sup> mice

**A**, Diagram depicting showing intraperitoneal administrations of Tmx for three consecutive days, four intraperitoneal injections of EdU every alternative days one week later, and sampling for analyses in PG-WT and PG-*Erg/Fli1*<sup>ΔLEC</sup> mice

**B-D**, Representative images and comparisons of number of *Prox1*<sup>+</sup>/EdU<sup>+</sup> LEC (white arrowheads) or *Prox1*<sup>+</sup>/caspase-3<sup>+</sup> LEC in mesenteric lymphatic valve between PG-WT and PG-*Erg/Fli1*<sup>ΔLEC</sup> mice. Similar findings are shown from n = 4-5 mice/group from two independent experiments. Scale bars, 50 μm. Bars indicate mean ± SD and *P* value versus WT by two-tailed Mann-Whitney *U* test.



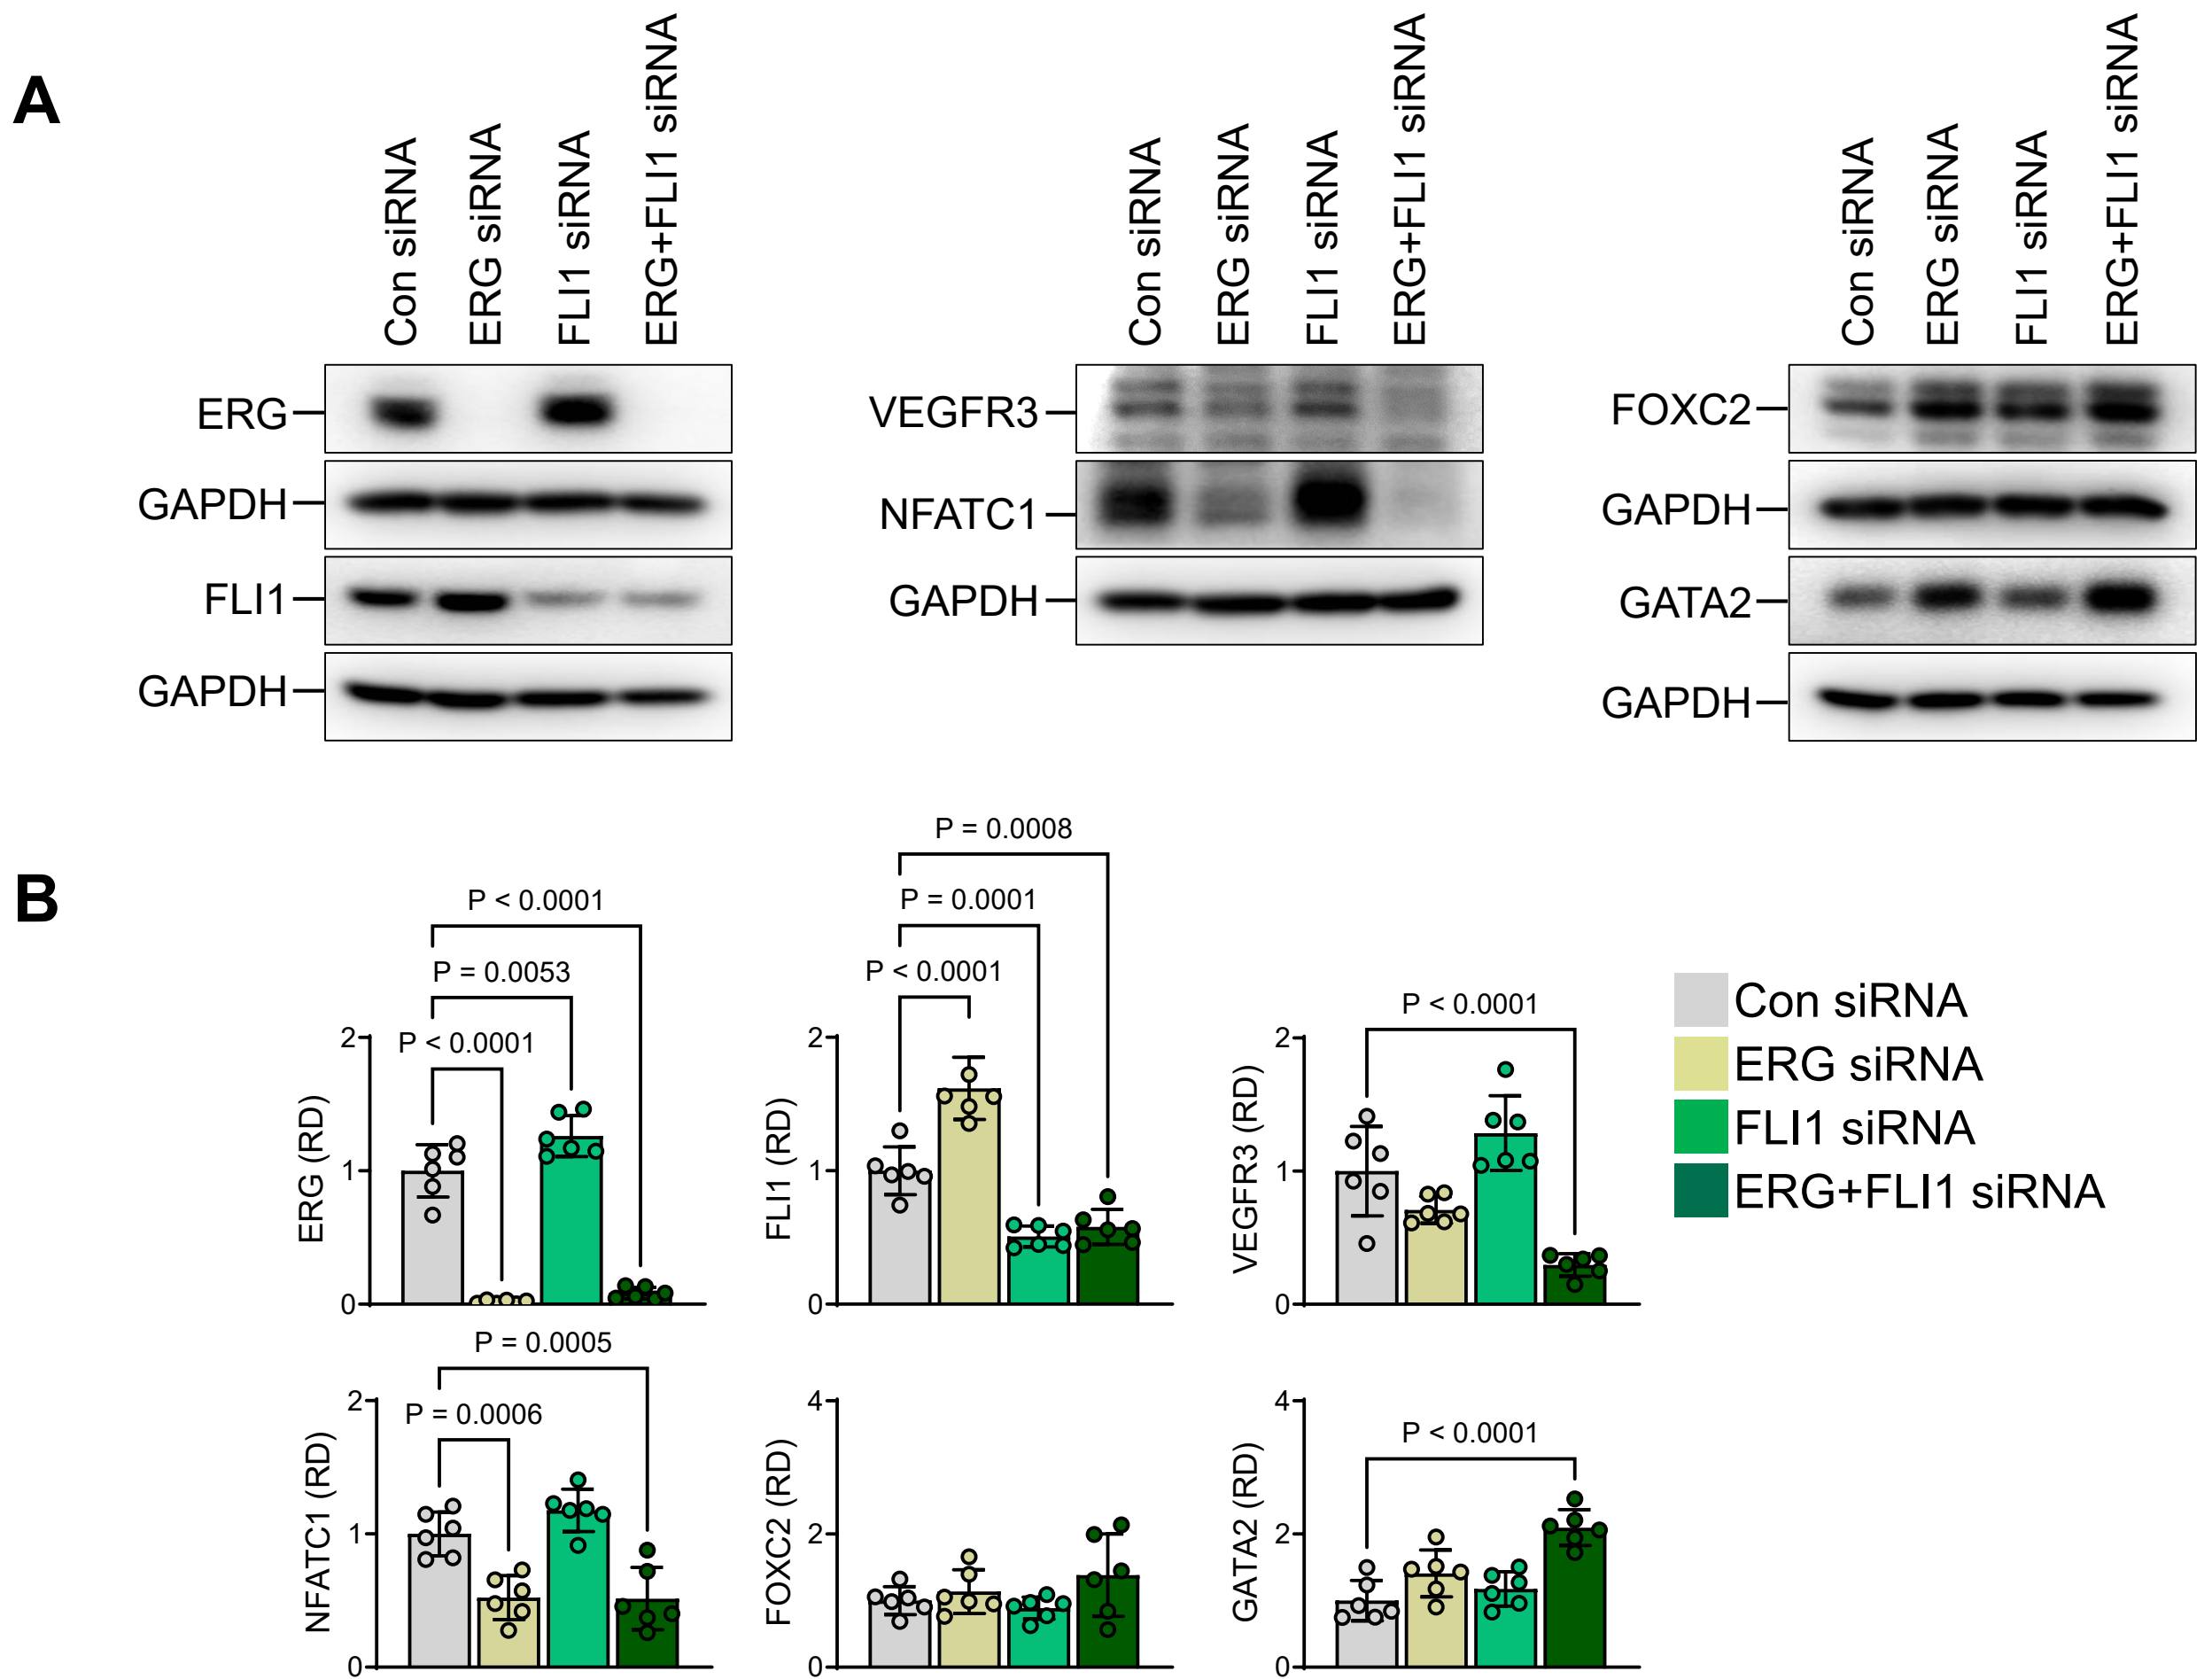

**Supplemental Figure 11. ERG transcriptionally regulates NFATC1 expression in human LEC**

**A,B**, Representative immunoblotting and comparisons of ERG, FLI1, VEGFR3, NFATC1, FOXC2, and GATA2 at 48 h after transfection of control, ERG, FLI1, or ERG+FLI1 siRNA in primary cultured human LEC. The same amount of protein loading in each lane is verified by immunoblotting of GAPDH. Each dot indicates a value from one sample and  $n = 6$  samples/group from two independent experiments. Bars indicate mean  $\pm$  SD and  $P$  value versus WT by one-way ANOVA test followed by Dunnett's *post-hoc* test.



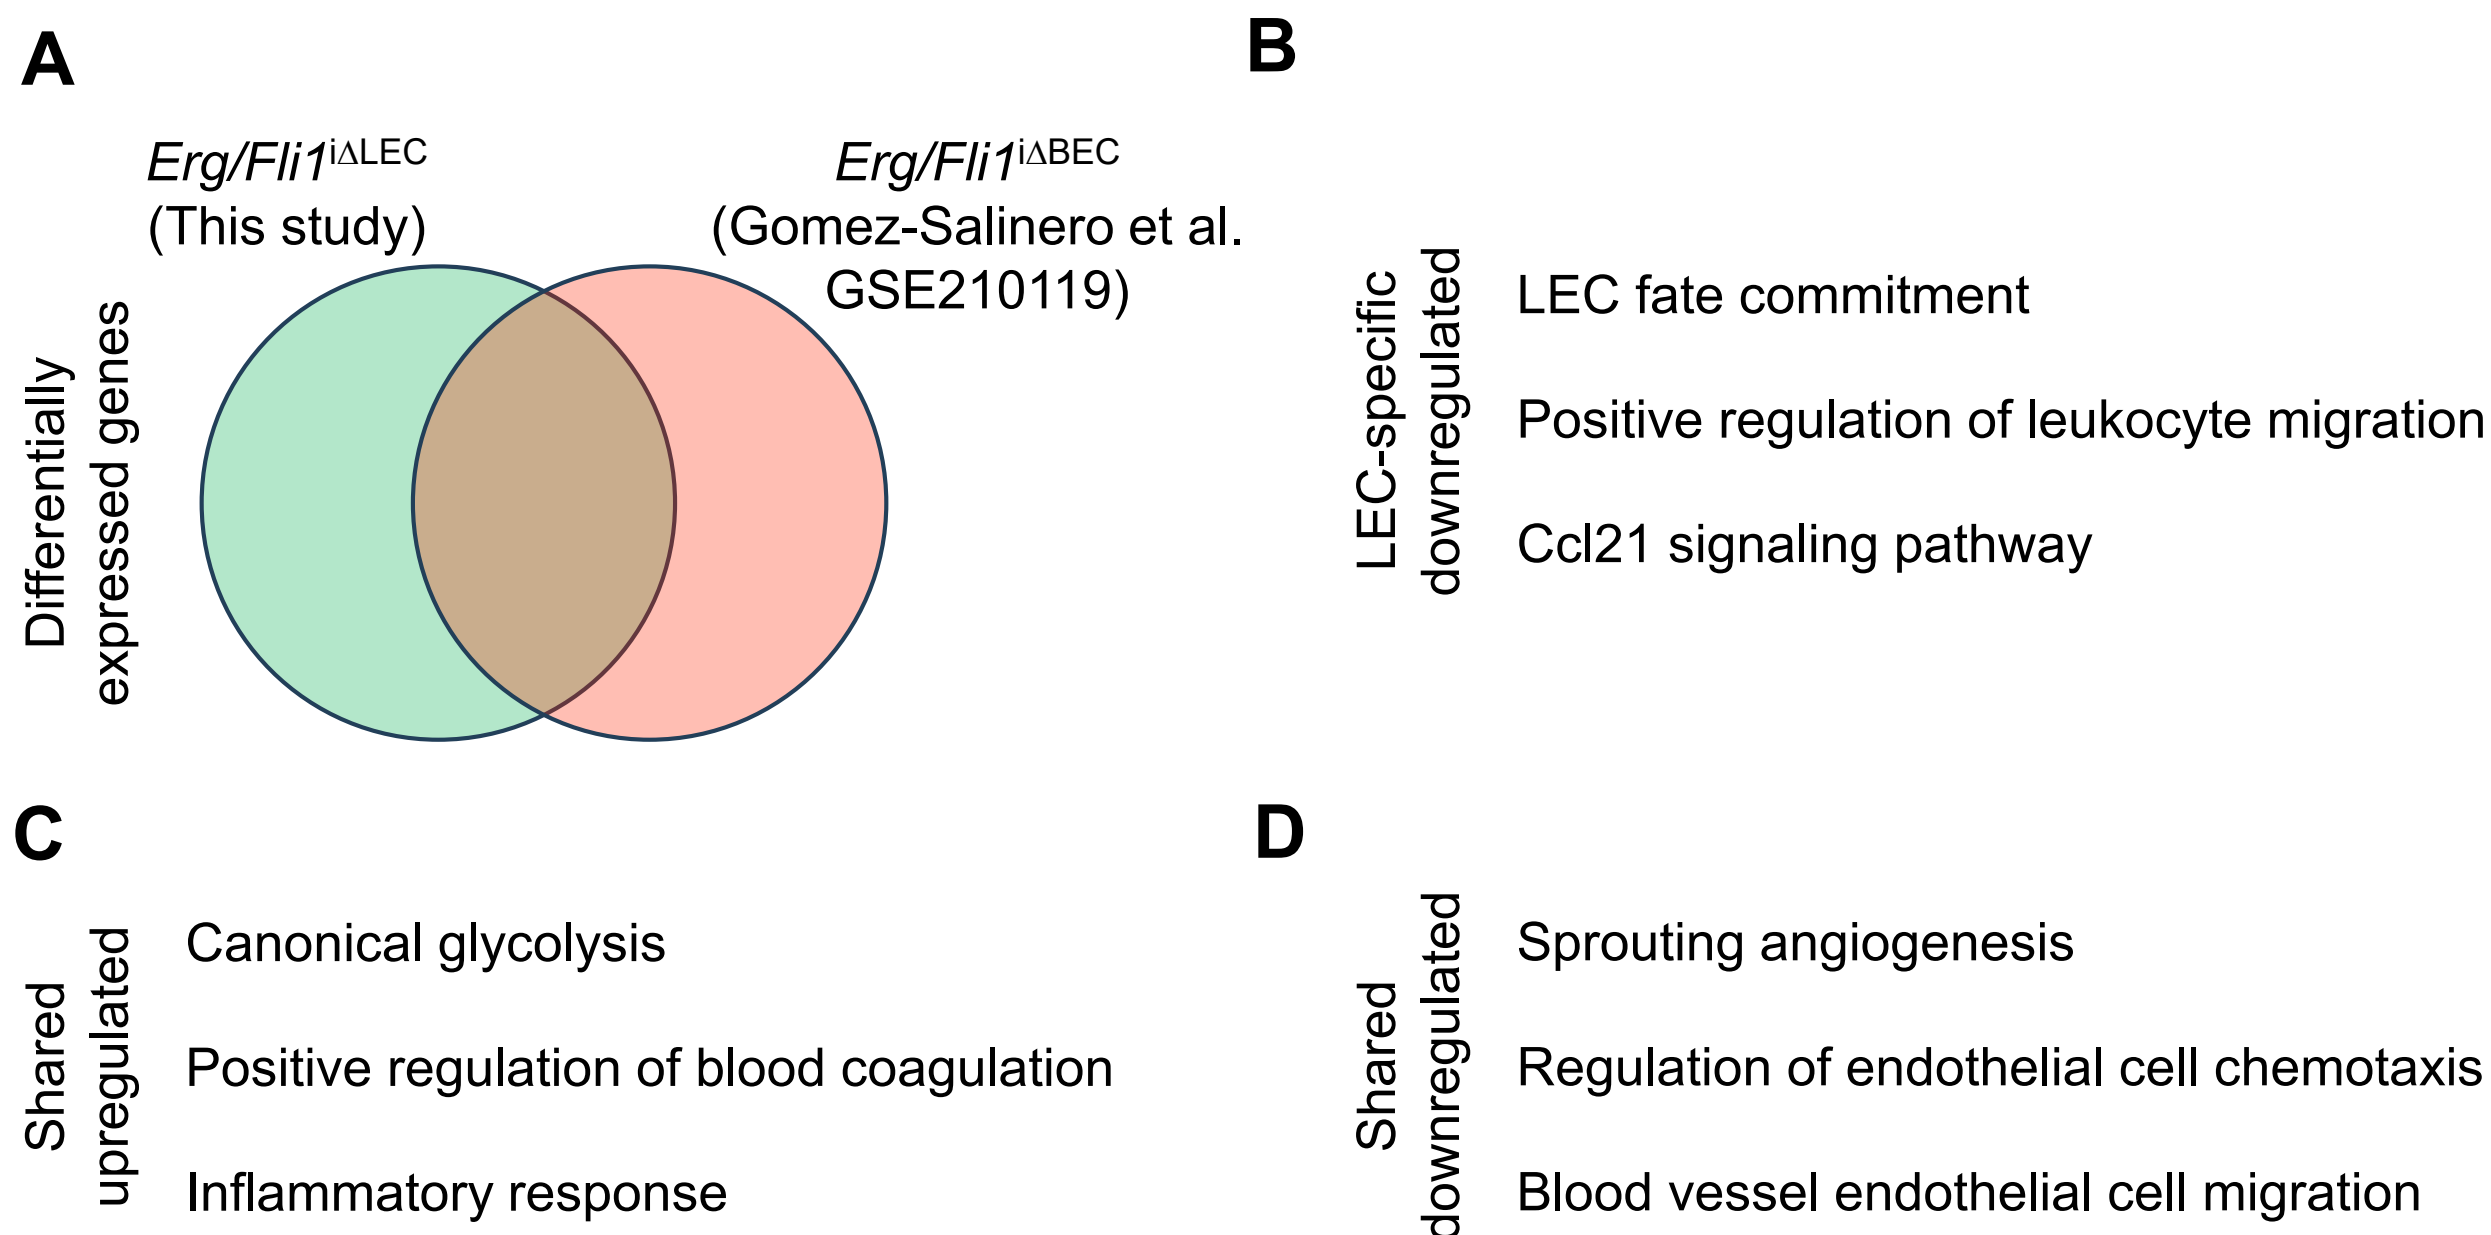

**Supplemental Figure 12. Comparison of Erg/Fli1-regulated genes between blood and lymphatic endothelial cells**

**A**, Venn diagram depicting comparison of differentially expressed genes after deletion of Erg and Fli1 in LEC or blood endothelial cells (BEC).

**B-D**, Bar plots showing significantly enriched gene ontology terms of LEC-specific downregulated genes, genes upregulated or downregulated in both LEC and BEC.



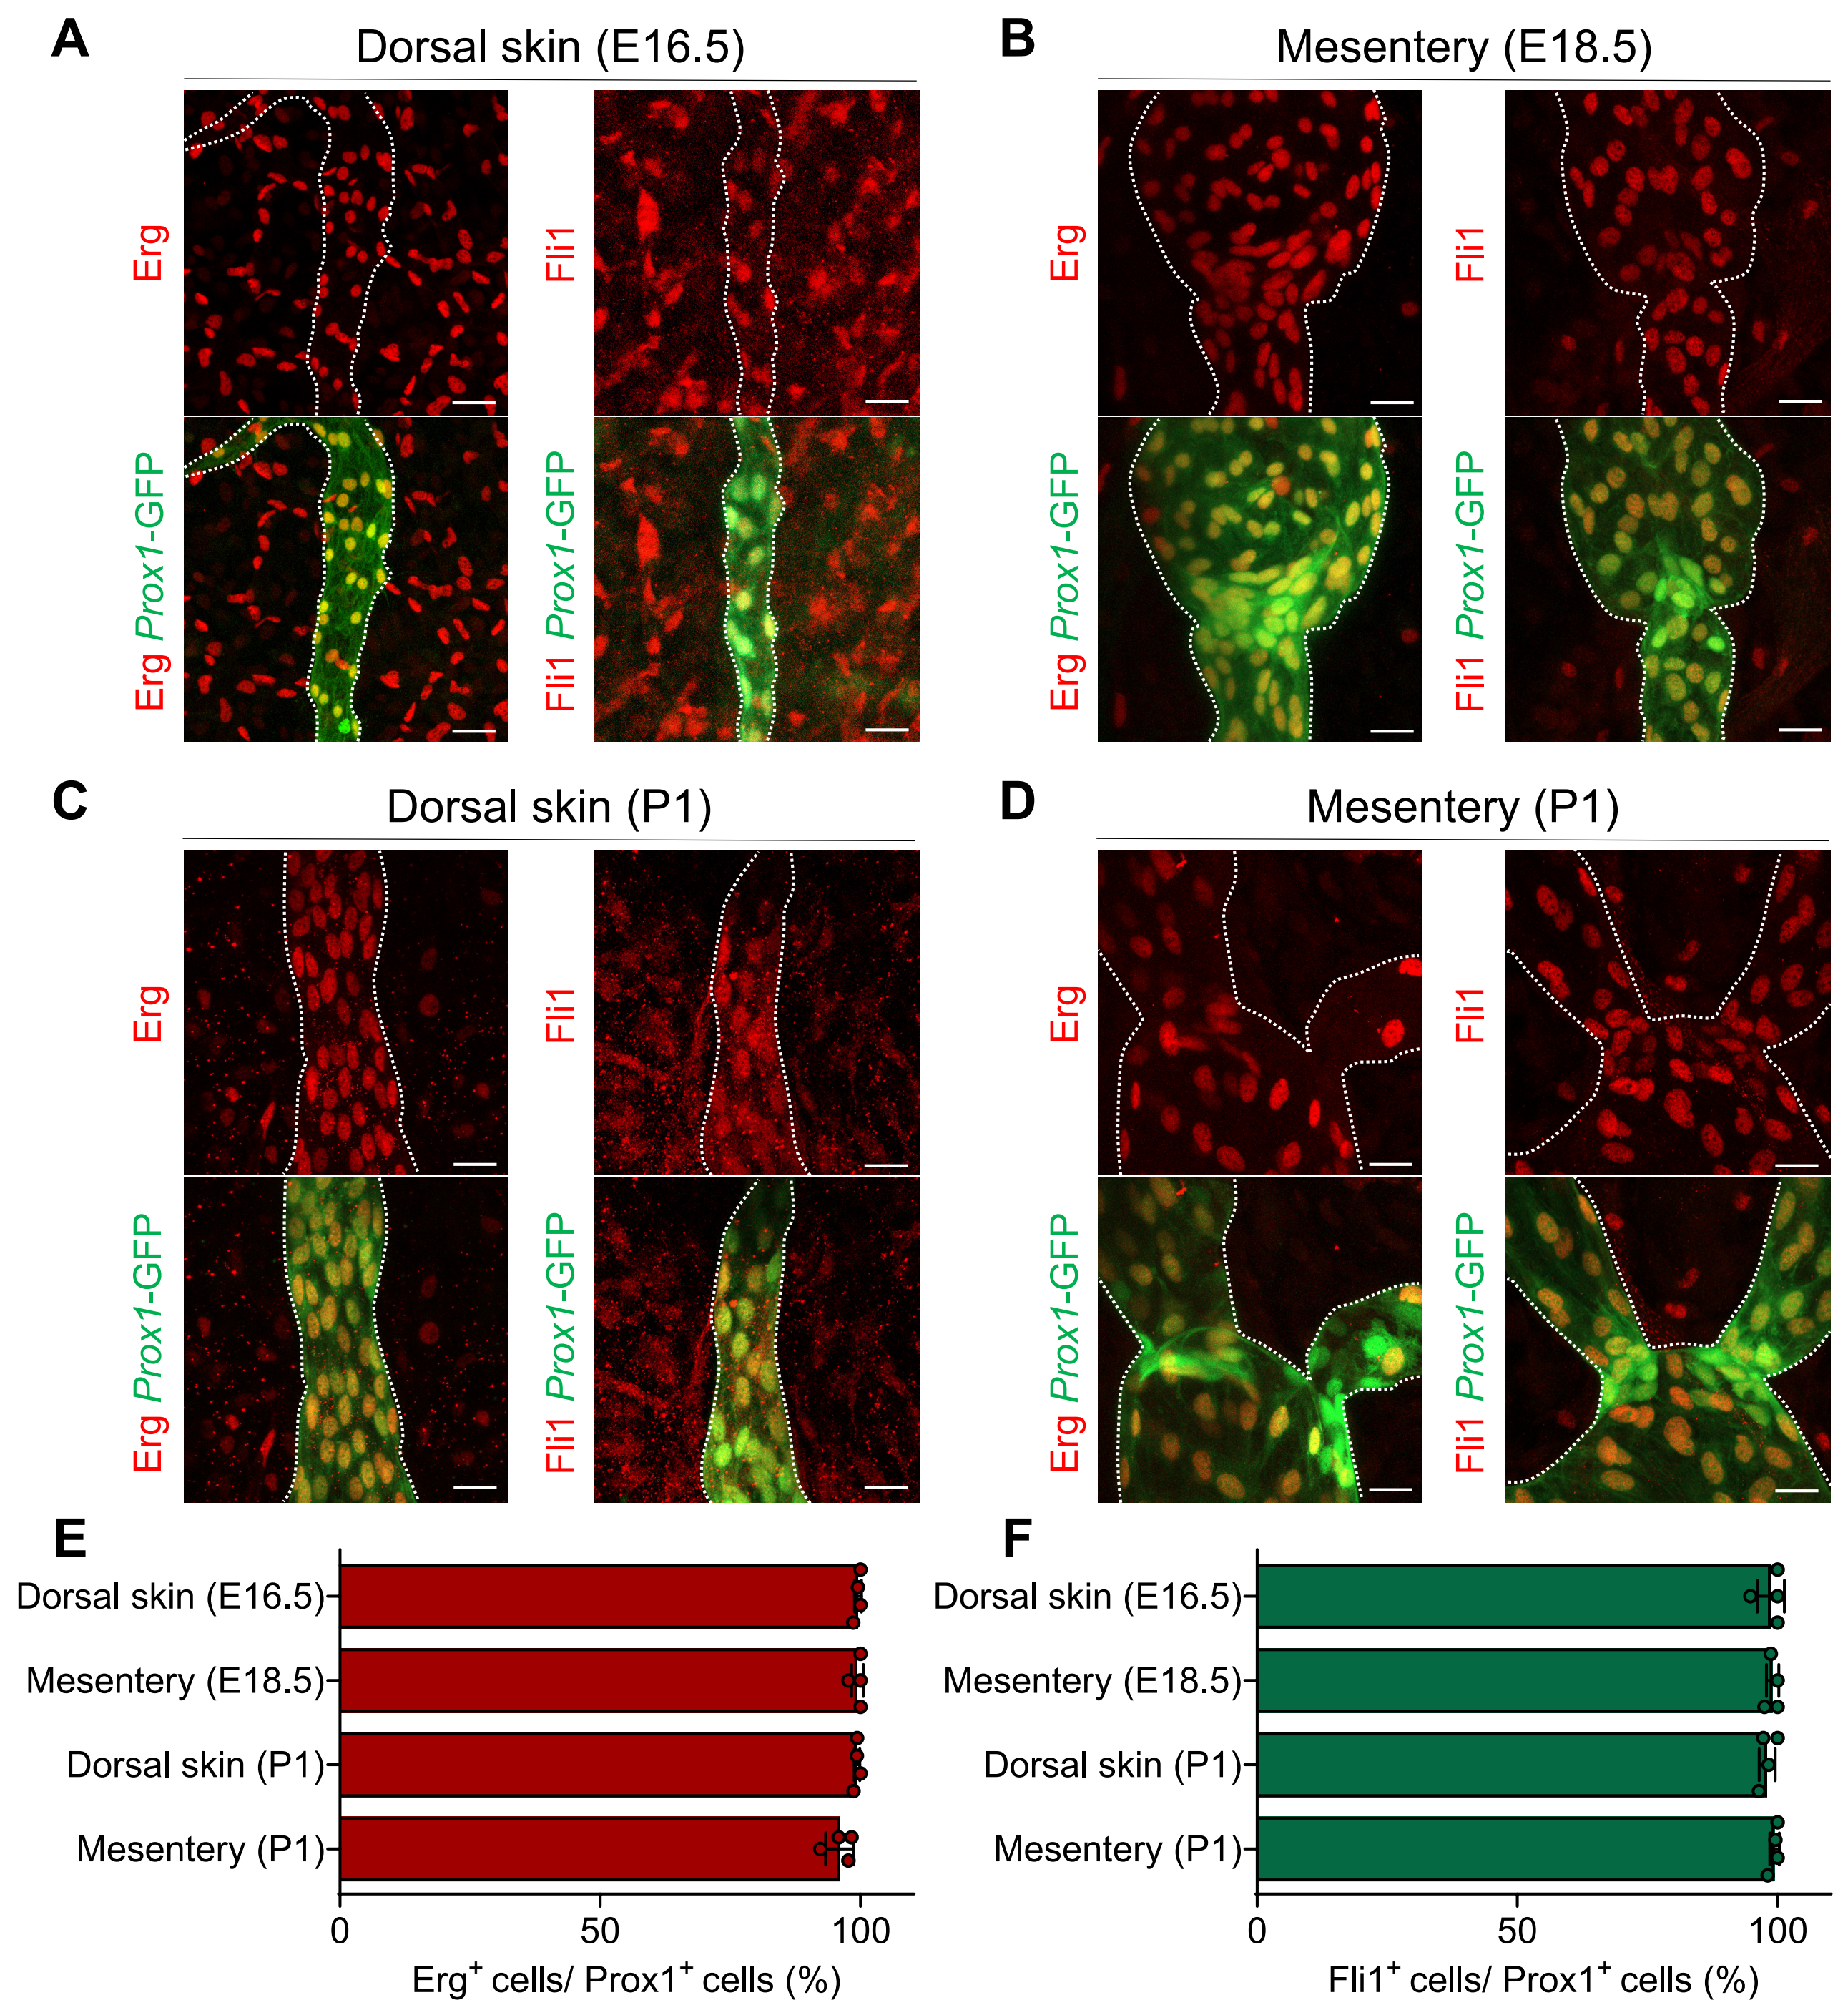

### Supplemental Figure 13. Erg and Fli1 are present in LEC of dorsal dermal and mesenteric lymphatics during embryonic and postnatal periods

**A-F**, Representative images and percentages of *Erg*<sup>+</sup> and *Fli1*<sup>+</sup> LEC in the dorsal dermal or mesenteric lymphatics (white dotted lines) at embryonic day (E) 16.5, 18.5, or postnatal day (P)1. Scale bars, 20  $\mu$ m. Each dot indicates a value from one mouse and n = 4 mice/group from two independent experiments. Vertical bars indicate mean  $\pm$  SD.



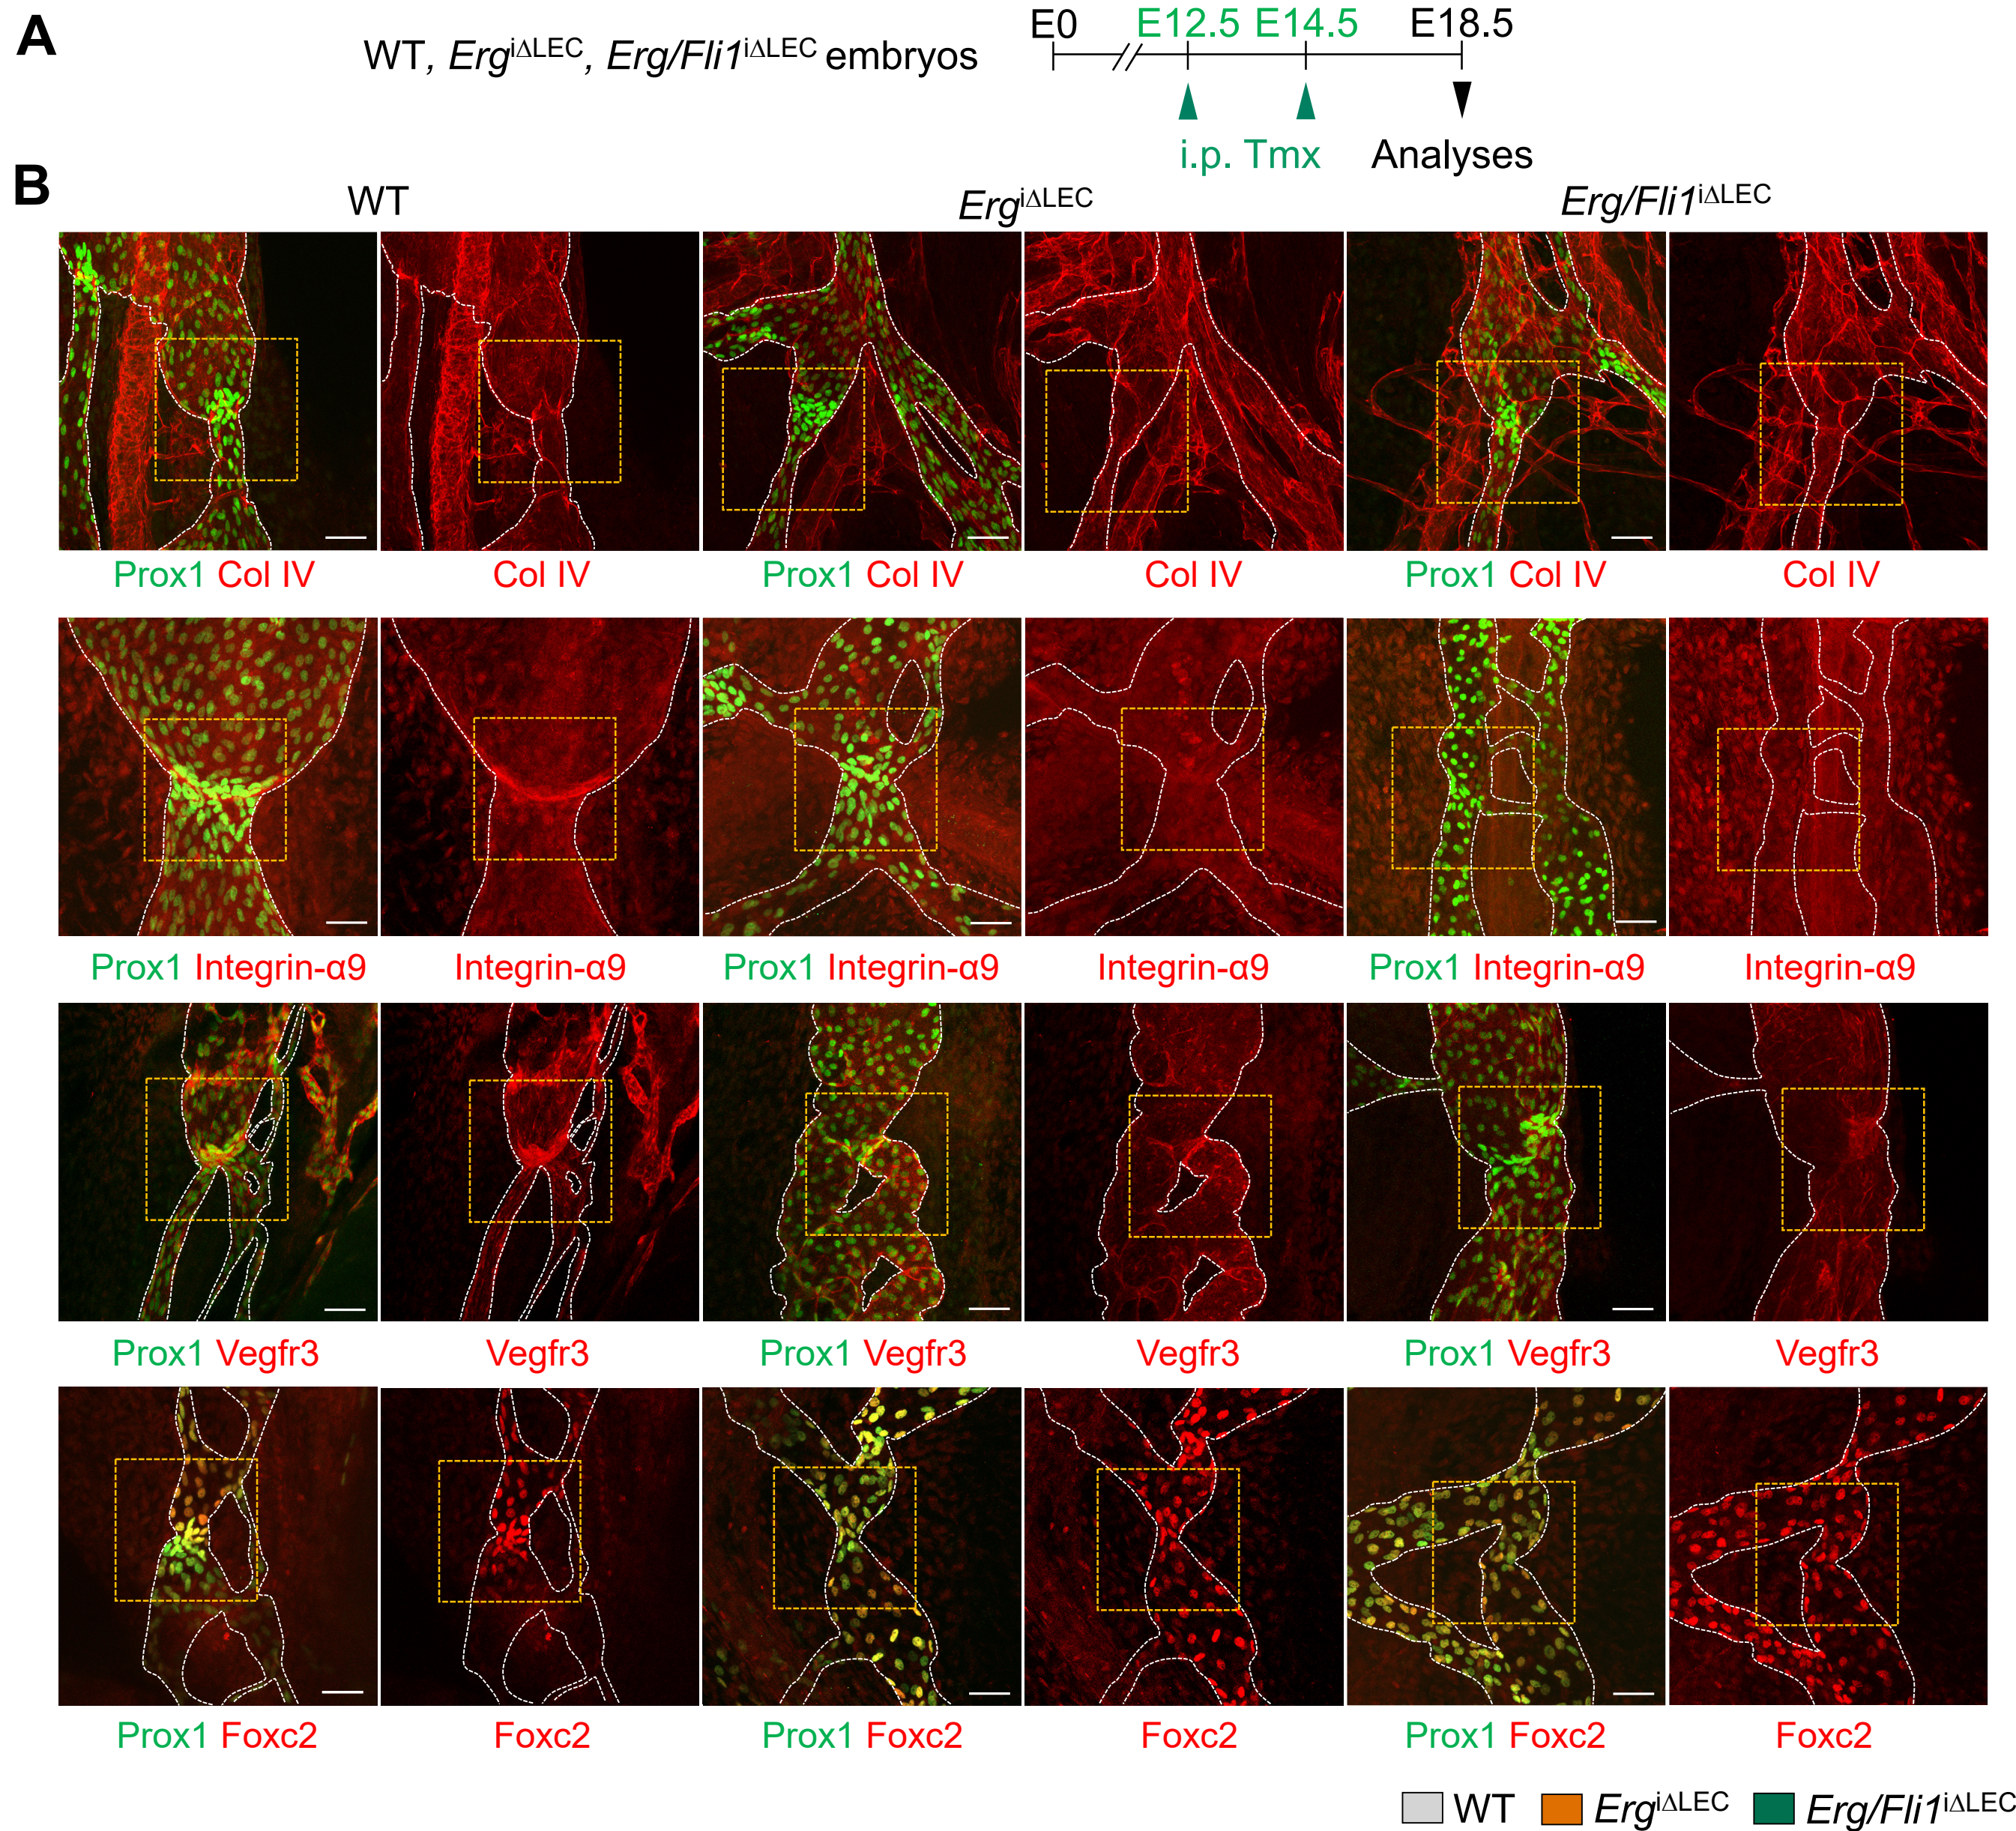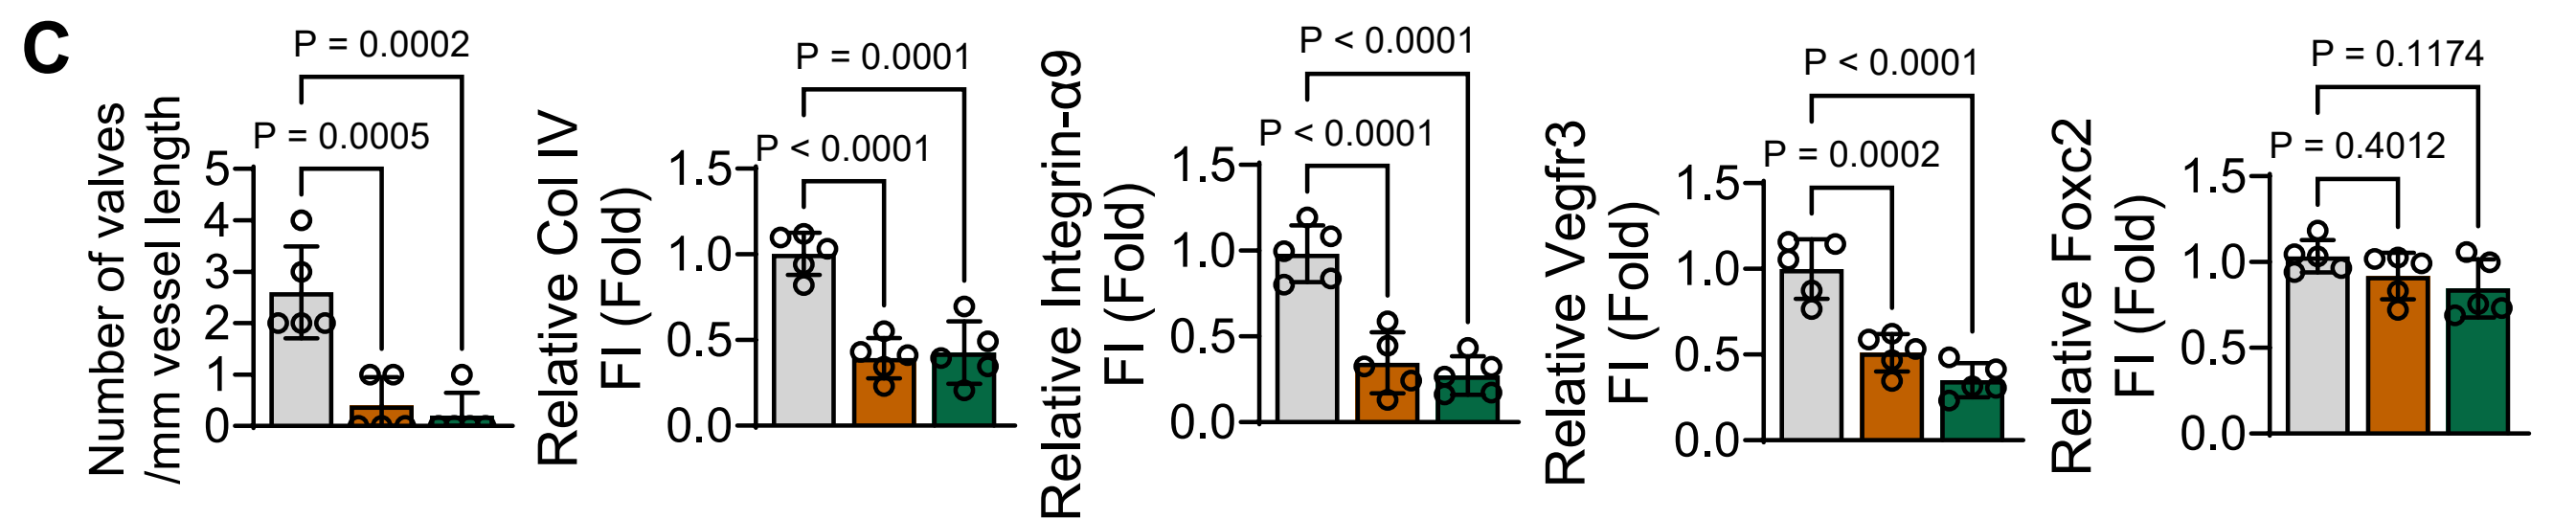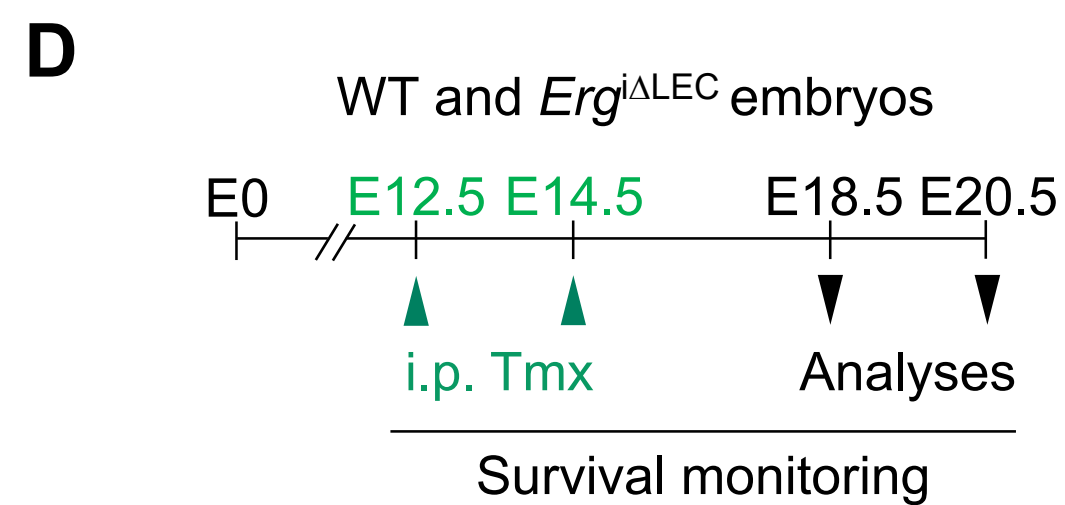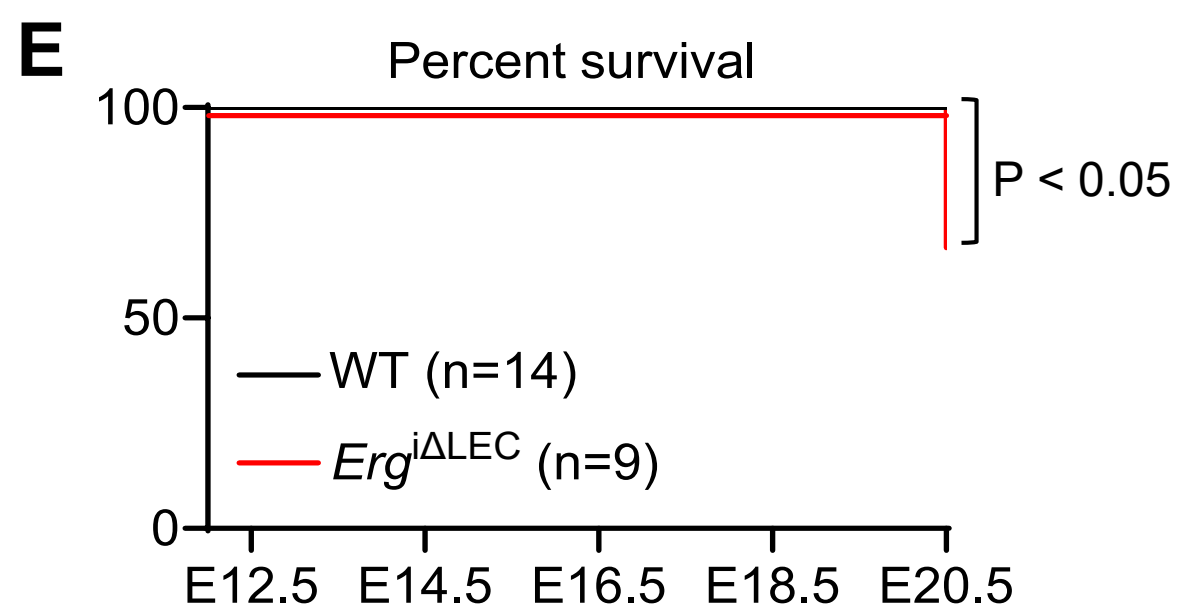



## Supplemental Figure 14. Erg and Fli1 regulate lymphatic valve formation during embryonic development

**A**, Diagram depicting i.p. injection of Tmx to the pregnant mothers carrying WT, *Erg*<sup>iΔLEC</sup> and *Erg/Fli1*<sup>iΔLEC</sup> embryos at E12.5 and E14.5, and sampling at E18.5.

**B,C**, Representative images and comparisons of number of valves and expressions of valve markers, Col IV, Integrin-α9, Vegfr3, and Foxc2 in mesenteric lymphatics of WT, *Erg*<sup>iΔLEC</sup> and *Erg/Fli1*<sup>iΔLEC</sup> embryos. Yellow lined boxes indicate mesenteric lymphatic valve areas. Scale bars, 40 μm. Each dot indicates a value from one mouse and n = 5 mice/group from two independent experiments. Bars indicate mean ± SD and *P* value versus WT by one-way ANOVA test followed by Tukey's post-hoc test.

**D**, Diagram depicting i.p. injection of Tmx to the pregnant mothers carrying WT and *Erg*<sup>iΔLEC</sup> embryos at E12.5 and E14.5, and survival rate analysis at E18.5 and E20.5.

**E**, Kaplan-Meier curve showing survival rate of the indicated embryos following the initial Tmx administration. n = 9 or 14 mice/each group from two independent experiments. *P* value versus WT by Mantel-Cox comparison.



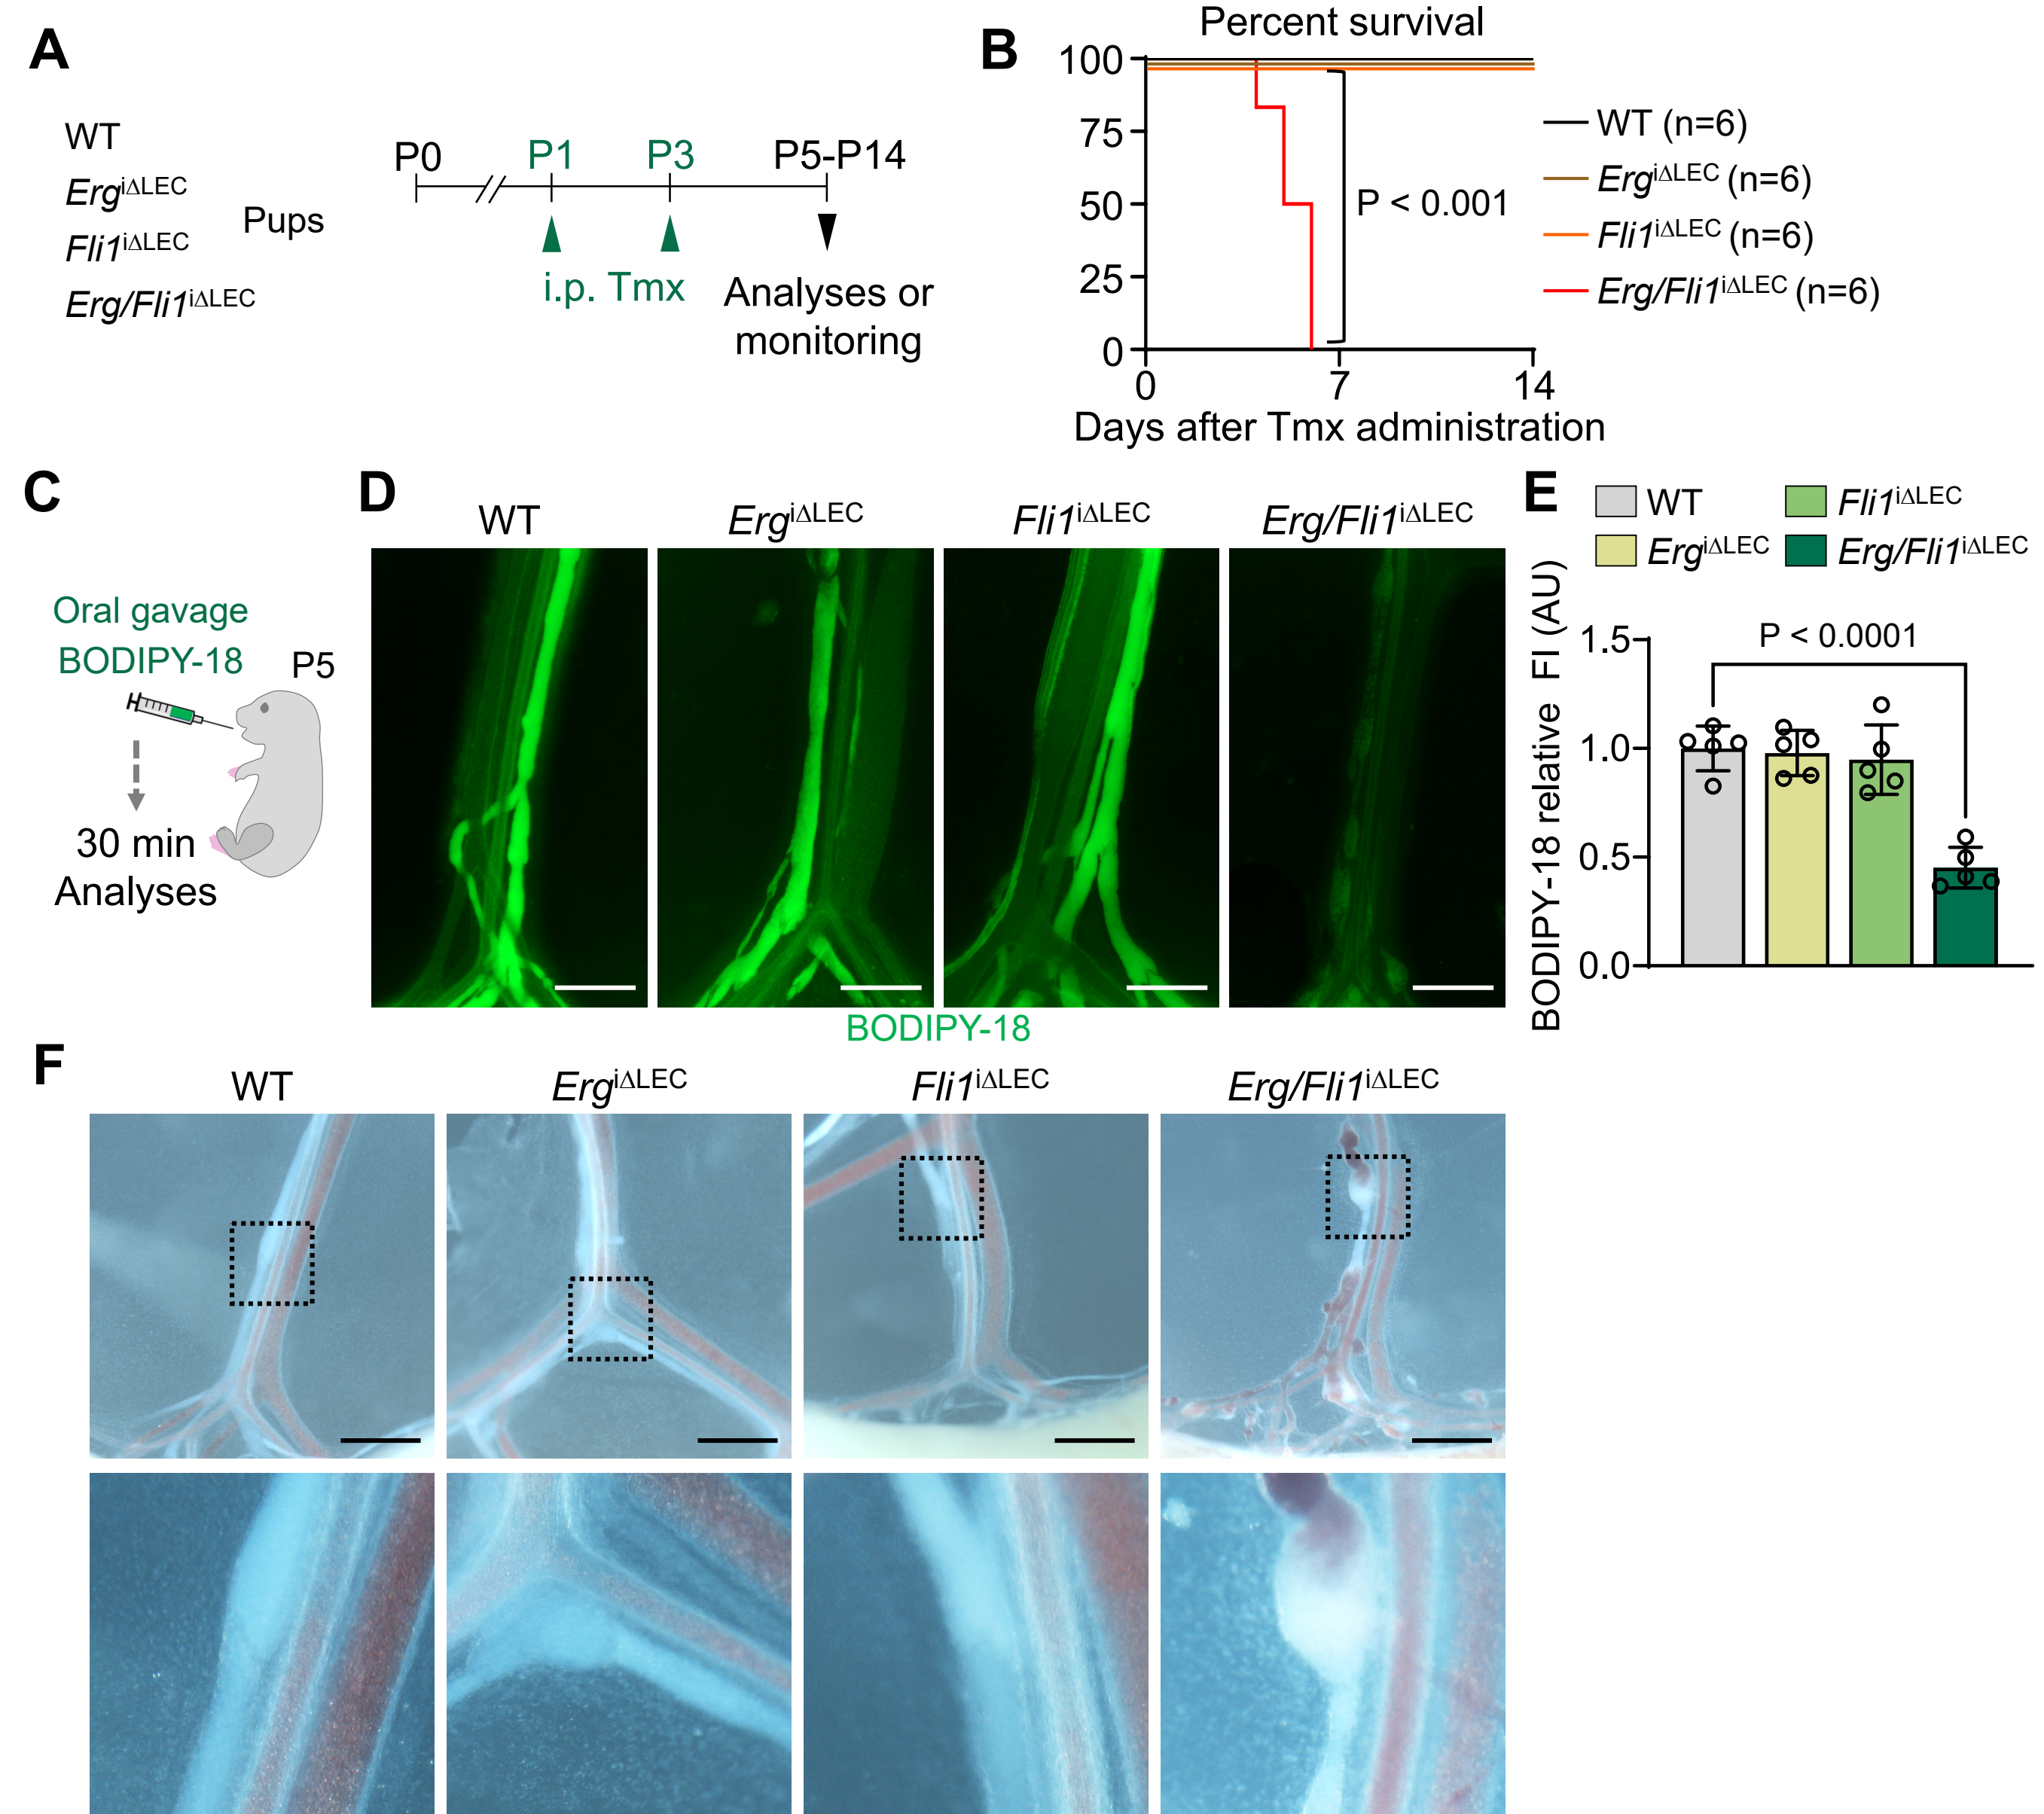

**Supplemental Figure 15. Postnatal deletion of Erg and FLI1 impairs lymphatic drainage**

**A**, Diagram depicting intraperitoneal injection of Tmx to WT, *Erg*<sup>ΔLEC</sup>, *Fli1*<sup>ΔLEC</sup>, and *Erg/Fli1*<sup>ΔLEC</sup> postnatal pups at postnatal day 1 (P1), and P3 and analyses at P5 or survival monitoring for 14 days .

**B**, Kaplan-Meier curve showing survival rate of the indicated pups following the initial Tmx administration. n = 6 mice/group from two independent experiments. *P* value versus WT by Mantel-Cox comparison.

**C**, Schematic diagram depicting oral gavage of BODIPY-18 to P5 mice and imaging of mesenteries 30 min later.

**D,E**, Representative images and comparison of absorbed BODIPY-18 in mesentery of indicated mice pups. Scale bars, 500 μm. Each dot indicates a value from one mouse and n = 5 mice/group from two independent experiments. Bars indicate mean ± SD and *P* value versus WT by one-way ANOVA test followed by Dunnett's *post-hoc* test.

**F**, Representative images showing mesenteries of WT, *Erg*<sup>ΔLEC</sup>, *Fli1*<sup>ΔLEC</sup>, and *Erg/Fli1*<sup>ΔLEC</sup> at P5. Black dashed line boxes are enlarged in the below panels. Scale bars, 1 mm.



Supplemental Table 1. *CCL21* primer sets used for ChIP-qPCR

| Primer                                   |         | Primer sequence (5'-3')   |
|------------------------------------------|---------|---------------------------|
| <i>CCL21_R1</i> (R1)                     | Forward | TTGGGCTTTCCAGAAGGGGCACTT  |
|                                          | Reverse | TTATGTTGTGGAGAAGCCACCCTCC |
| <i>CCL21_R2</i> (R2)                     | Forward | CCTGGTCTCAACAATGTGGCTGTGT |
|                                          | Reverse | GAGATGGGTGTGTAGGTGAAGGATG |
| <i>CCL21_R3</i> (R3)                     | Forward | AAGACTCTGGGAACAACGTACCC   |
|                                          | Reverse | GGGGAGAGGGGCAGATCAGTTTT   |
| <i>CCL21_R4</i> (R4)                     | Forward | CCTAAGGGACAGGCTTGCTTTG    |
|                                          | Reverse | CCCCGCAAAAAGATTCTGTCCC    |
| <i>CCL21_R5</i> (R5)                     | Forward | CCACACTGTAATATTCAGAATGCCC |
|                                          | Reverse | CTATGTCCAATATCTGGGCTTCCTC |
| <i>CCL21_R6</i> (R6)                     | Forward | CCACTTAGTTTGAGATAAGTGGGG  |
|                                          | Reverse | GTAGCTAGACACTTTCACCTCCC   |
| <i>CCL21_R7</i> (R7)                     | Forward | CAGCATCTGGACAAGACACCATC   |
|                                          | Reverse | AGCCTTTGGAGCCCTTTCCTTTC   |
| Negative control<br>( <i>RELA</i> (P65)) | Forward | TTCCATATCTGGCCACAAAA      |
|                                          | Reverse | TCCGTGTTCATGATTCATTG      |
